1      **Generation of tumorigenic porcine pancreatic ductal epithelial cells:**  
2      **toward a large animal model of pancreatic cancer**

3  
4      Neeley Remmers<sup>1,2</sup>, Jesse L. Cox<sup>3</sup>, James A. Grunkemeyer<sup>4</sup>, Shruthi Aravind<sup>1,2</sup>, Christopher K.  
5      Arkfeld<sup>1,2</sup>, Michael A. Hollingsworth<sup>4</sup>, Mark A. Carlson<sup>1,2,5\*</sup>

6  
7      <sup>1</sup>Department of Surgery, University of Nebraska Medical Center, Omaha, NE, USA

8      <sup>2</sup>Surgery Department, VA Nebraska-Western Iowa Health Care System, Omaha, NE, USA

9      <sup>3</sup>Department of Pathology and Microbiology, University of Nebraska Medical Center, Omaha,  
10      NE, USA

11      <sup>4</sup>Eppley Cancer Institute, University of Nebraska Medical Center, Omaha, NE, USA

12      <sup>5</sup>Department of Genetics, Cell Biology and Anatomy, University of Nebraska Medical Center,  
13      Omaha, NE, USA

14  
15  
16  
17  
18      \*Corresponding author

19      Email: macarls@unmc.edu (MAC)

## 22 Abstract

23

24 **Background.** A large animal model of pancreatic cancer would permit development of  
25 diagnostic and interventional technologies not possible in murine models, and also would  
26 provide a more biologically-relevant platform for penultimate testing of novel therapies, prior to  
27 human testing. Here, we describe our initial studies in the development of an autochthonous,  
28 genetically-defined, large animal model of pancreatic cancer, using immunocompetent pigs.

29

30 **Methods.** Primary pancreatic epithelial cells were isolated from pancreatic duct of domestic  
31 pigs; epithelial origin was confirmed with immunohistochemistry. Three transformed cell lines  
32 subsequently were generated from these primary cells using expression of oncogenic KRAS and  
33 dominant negative p53, with/without knockdown of p16 and SMAD4. We tested these cell lines  
34 using *in vitro* and *in vivo* assays of transformation and tumorigenesis.

35

36 **Results.** The transformed cell lines outperformed the primary cells in terms proliferation,  
37 population doubling time, soft agar growth, 2D migration, and Matrigel invasion, with the  
38 greatest differences observed when all four genes (KRAS, p53, p16, and SMAD4) were targeted.  
39 All three transformed cell lines grew tumors when injected subcutaneously in nude mice,  
40 demonstrating undifferentiated morphology, mild desmoplasia, and staining for both epithelial  
41 and mesenchymal markers. Injection into the pancreas of nude mice resulted in distant  
42 metastases, particularly when all four genes were targeted.

43

44       **Conclusions.** Tumorigenic porcine pancreatic cell lines were generated. Inclusion of four genetic  
45       “hits” (KRAS, p53, p16, and SMAD4) appeared to produce the best results in our *in vitro* and *in*  
46       *vivo* assays. The next step will be to perform autologous or syngeneic implantation of these cell  
47       lines into the pancreas of immunocompetent pigs. We believe that the resultant large animal  
48       model of pancreatic cancer could supplement existing murine models, thus improving preclinical  
49       research on diagnostic, interventional, and therapeutic technologies.

50

51

## 52 Introduction

53 In the United States in 2016, approximately 53,000 people (48% female) were diagnosed  
54 with pancreatic cancer (~3.1% of all new cancer diagnoses), and there were ~42,000 deaths (49%  
55 female) from pancreatic cancer (~7.0% of all cancer deaths) [1,2]. The lifetime risk for  
56 pancreatic cancer is approximately 1 in 65 [1,2]. The incidence of pancreatic cancer has been  
57 gradually increasing since the mid-1990's, and generally is higher in the African-American  
58 population [1,2]. Pancreatic cancer is now the fourth most common cause of cancer-related  
59 death in both men and women (after lung, prostate, and colorectal cancer, or lung, breast, and  
60 colorectal cancer, respectively) [1,2]. Despite apparent advances in treatment modalities and  
61 strategies [3], mortality from pancreatic cancer has not decreased [1,2]. As of 2012, the U.S.  
62 overall 5-year survival rate from pancreatic cancer was 7.7%; 5-year survival rates in localized,  
63 regional (nodal spread), or metastatic disease were 29.3, 11.1, and 2.6%, respectively [1,2]. So  
64 there remains a need for improved early diagnosis and therapy for pancreatic cancer.

65 Rodent models of pancreatic cancer may not accurately reflect human biology because of  
66 differences in physiology, anatomy, immune response, and genetic sequence between the two  
67 species [4-7]. Remarkably, only 5-8% of anti-cancer drugs that emerged from preclinical studies  
68 and entered clinical studies have been ultimately approved for clinical use [8,9]. The cause of  
69 this low approval rate is multifactorial, but likely includes the less-than-optimal predictive ability  
70 of some murine models (e.g., tumor xenografting into immunosuppressed mice) to determine the  
71 efficacy of various therapeutics in humans [4-6,10-14]. Moreover, there are a number of genes  
72 for which the genotype-phenotype relationship is discordant between mice and human, including  
73 *CFTR*<sup>-/-</sup> and *APC*<sup>+/-</sup> [15,16]. Incidentally, both the porcine *CFTR*<sup>-/-</sup> and *APC*<sup>+/-</sup> mutants reiterate



74 the human phenotype (pulmonary/GI disease and rectal polyposis, respectively) [15-17], in  
75 contradistinction to the murine mutants.

76 In fairness, the recent trend to employ genetically-engineered mouse models (GEMM),  
77 patient-derived xenografts (PDX), humanized mice, and *in vivo* site-directed CRISPR/Cas9  
78 gene-edited mice in the testing of anti-cancer therapeutics may yield murine models with better  
79 predictive ability than obtained with previously [6,18-22]. Though promising, these more  
80 advanced murine models come with increased cost and complexity [20], and experience with  
81 them still is early. Importantly, all murine models have limited utility in the development of  
82 diagnostic or interventional technology that requires an animal subject whose size approximates  
83 a human. So at present, there remains a need for improved animal models of pancreatic cancer  
84 that (1) are more predictive of human response to anti-cancer therapy [20,22], and (2) are of  
85 adequate size for development of specific technologies. Herein we describe some initial steps  
86 taken in the development of a genetically-defined, autochthonous model of pancreatic cancer in  
87 immunocompetent pigs.

88

## 89 **Materials and Methods**

90

### 91 **Standards, rigor, reproducibility, and transparency**

92 The animal studies of this report were designed, performed, and reported in accordance  
93 with both the ARRIVE recommendations (Animal Research: Reporting of *In Vivo* Experiments  
94 [23]) and the National Institutes of Health Principles and Guidelines for Reporting Preclinical  
95 Research [24,25]; for details, refer to Tables S1 and S2, respectively.

96

### 97 **Materials and animal subjects**

98 All reagents were purchased through Thermo Fisher Scientific ([www.thermofisher.com](http://www.thermofisher.com))  
99 unless otherwise noted. Short DNA sequences for vector construction, mutagenesis, and  
100 amplification purposes are shown in Table S3. Antibody information is given in Table S4. Wild  
101 type domestic swine (male and female; age 3 months at time of purchase; 30-32 kg) were  
102 purchased from the Animal Research and Development Center of the University of Nebraska  
103 Lincoln ([ardc.unl.edu](http://ardc.unl.edu)). Athymic homozygous nude mice (CrI:NU(NCr)-*Foxn1<sup>nu</sup>*; female; 8-9  
104 weeks old) were purchased from Charles River Laboratories, Inc. ([www.criver.com](http://www.criver.com)). Primers  
105 utilized in this report (Table S3) were synthesized by Integrated DNA Technologies, Inc.  
106 ([www.idtdna.com](http://www.idtdna.com)). DNA sequencing was performed by the UNMC Genomics Core Facility  
107 ([www.unmc.edu/vcr/cores/vcr-cores/genomics](http://www.unmc.edu/vcr/cores/vcr-cores/genomics)). Oncopigs [26] were purchased from the  
108 National Swine Resource and Research Center (NSRRC; [www.nsrrc.missouri.edu](http://www.nsrrc.missouri.edu)).

109

### 110 **Animal welfare**

111 The animals utilized to generate data for this report were maintained and treated in  
112 accordance with the *Guide for the Care and Use of Laboratory Animals* (8<sup>th</sup> ed.) from the  
113 National Research Council and the National Institutes of Health [27], and also in accordance  
114 with the Animal Welfare Act of the United States (U.S. Code 7, Sections 2131 – 2159). The  
115 animal protocols pertaining to this manuscript were approved by the Institutional Animal Care  
116 and Use Committee (IACUC) of the VA Nebraska-Western Iowa Health Care System (ID  
117 numbers 00927, 00937, 00998, and 01017) or by the IACUC of the University of Nebraska  
118 Medical Center (ID number 16-133-11-FC). All procedures were performed in animal facilities  
119 approved by the Association for Assessment and Accreditation of Laboratory Animal Care  
120 International (AAALAC; [www.aaalac.org](http://www.aaalac.org)) and by the Office of Laboratory Animal Welfare of  
121 the Public Health Service ([grants.nih.gov/grants/olaw/olaw.htm](http://grants.nih.gov/grants/olaw/olaw.htm)). All surgical procedures were  
122 performed under isoflurane anesthesia, and all efforts were made to minimize suffering.  
123 Euthanasia was performed in accordance with the AVMA Guidelines for the Euthanasia of  
124 Animals [28].

125

## 126 **Porcine operative procedures**

127 Further details on transgenic porcine subjects and related welfare, safety, husbandry,  
128 operative procedures, and perioperative management are given in the Supporting Information.

129

## 130 **Isolation of porcine pancreatic ductal epithelial cells**

131 A detailed protocol for isolation of porcine pancreatic ductal epithelial cells is provided  
132 in the Supporting Information (**Protocol S1**). In brief, the intact pancreas from male porcine  
133 research subjects (age 5 mo) was harvested within 5 min after euthanasia, which was

134 accomplished by transection of the intrathoracic inferior vena cava and exsanguination while  
135 under deep isoflurane anesthesia. These pigs had been on a protocol to study biomaterials within  
136 skin wounds of the dorsum. The subject had not received any recent medication other the  
137 anesthetics given for euthanasia; buprenorphine and cefovecin sodium had been given 4 weeks  
138 prior to euthanasia. Immediately after explantation of the pancreas, the main pancreatic duct was  
139 dissected sterilely with micro instruments from the organ body under 3.5x loupe magnification.  
140 The duct then was mechanically digested by passage through a 70  $\mu\text{m}$  sieve (Corning™ Sterile  
141 Cell Strainers, Thermo Fisher Scientific, cat. no. 07-201-431).

142 The collected fragments were enzymatically digested with 1 mg/mL of Collagenase D at  
143 37°C for 1 h with gentle shaking. The cells were pelleted (600 g x 5 min), the supernatant was  
144 discarded, the cell pellet was resuspended in whole media, which was defined as: DMEM (high  
145 glucose with L-glutamine; Thermo Fisher Scientific, cat. no. 12100-046) supplemented with  
146 10% (final concentration) fetal bovine serum (FBS; Thermo Fisher Scientific, cat. no. 26140079)  
147 and 1% Antibiotic-Antimycotic Solution (Corning Inc., cat. no. 30-004-CI; cellgro.com). Cell  
148 concentration in the resuspension was determined with a hemocytometer, and cells then were  
149 diluted and pipetted into a 96-well plate (1-10 cell/well, 100-200  $\mu\text{L}$ /well). After 5-7 days of  
150 culture under standard conditions (whole media, 37°C, 5% CO<sub>2</sub>), wells that contained cells with  
151 epithelial-like morphology were trypsinized and re-plated into a new 96-well plate, in order to  
152 dilute out any fibroblasts. Cells were passaged in this fashion at least four times, until no cells  
153 with fibroblast morphology were present. The resulting cells were passaged up to a T25 flask,  
154 and maintained with standard conditions.

155

## 156 **Generation of p53 and KRAS mutants and construction of** 157 **expression vector**

158 In order to generate the porcine p53<sup>R167H</sup> mutant, wild-type p53 cDNA first was amplified  
159 from cervical lymph node tissue, which was obtained <5 min after euthanasia of a 4-month-old  
160 male domestic swine that had been on an unrelated research protocol. In brief, fresh nodal tissue  
161 was flash-frozen in liquid N<sub>2</sub> and then pulverized with a mortar and pestle, with continual  
162 addition of liquid N<sub>2</sub> during pulverization. The frozen powder then was placed into the first  
163 buffer solution of the QIAGEN RNEasy Mini Kit (cat. no. 74104; [www.qiagen.com](http://www.qiagen.com)), and total  
164 RNA was isolated per the manufacturer's instructions.

165 After isolation, the total RNA underwent reverse transcription to cDNA with a Verso  
166 cDNA Synthesis Kit (Thermo Fisher Scientific, cat. no. AB1453A), per the manufacturer's  
167 instructions. The wild type p53 sequence was amplified out of the cDNA using the PCR primers  
168 shown in Table S3, which flanked the p53 cDNA with *SalI* and *BamHI* restriction sites.  
169 Successful amplification of the wild-type p53 cDNA was confirmed by inserting the amplified  
170 candidate sequence into the TOPO<sup>®</sup> vector (TOPO<sup>®</sup> TA Cloning<sup>®</sup> Kit; Invitrogen<sup>™</sup>/Life  
171 Technologies<sup>™</sup>, Thermo Fisher Scientific, cat. no. K202020) per the manufacturer's  
172 instructions, followed by sequencing.

173 Site-directed mutation of wild-type p53 into p53<sup>R167H</sup> was performed using Agilent  
174 Technologies' QuickChange II Site-Directed Mutagenesis Kit (cat. no. 200523;  
175 [www.genomics.agilent.com](http://www.genomics.agilent.com)) with the mutagenic primers shown in Table S3, per the  
176 manufacturer's instructions. Presence of the p53<sup>R167H</sup> mutation was verified by sequencing as  
177 described above. The multiple cloning site of a pIRES2-AcGFP1 Vector (Takara Bio USA, Inc.,

178 cat. no. 632435; [www.clontech.com](http://www.clontech.com); manufacturer's vector information included as **Fig. S1**) was  
179 cut with *SalI* and *BamHI*, and the p53<sup>R167H</sup> sequence then was ligated into this plasmid.

180 The source of the porcine KRAS<sup>G12D</sup> mutant was the plasmid used to generate the  
181 p53/KRAS Oncopig [26,29]. The KRAS<sup>G12D</sup> cDNA was amplified out of this plasmid with  
182 primers (see Table S3) that flanked the sequence with *XhoI* and *PstI* restriction sites. The  
183 amplified product was inserted into the TOPO vector and verified by sequencing, as described  
184 above. The above pIRES2-AcGFP1 Vector (already containing the p53<sup>R167H</sup> sequence) then was  
185 cut with *XhoI* and *PstI*, and the KRAS<sup>G12D</sup> sequence was ligated into this plasmid, producing a  
186 pIRES2-AcGFP1 Vector which contained both mutant cDNAs within its multiple cloning site  
187 (KRAS<sup>G12D</sup> upstream).

188 The newly-constructed plasmid, hereafter designated as GKP (G = AcGFP1; K =  
189 KRAS<sup>G12D</sup>; P = p53<sup>R167H</sup>), was transformed into One Shot™ Stbl3™ Chemically Competent *E.*  
190 *coli* (Invitrogen™/Thermo Fisher Scientific, cat. no. C737303), per the manufacturer's  
191 instructions, and plasmid DNA subsequently was isolated using a QIAGEN Plasmid Maxi Kit  
192 (cat. no. 12162), per the manufacturer's instructions. This plasmid then was transfected into  
193 Takara's Lenti-X™ 293T cells (Clontech, cat. no. 632180), using Takara's Xfect™ Transfection  
194 Reagent (Clontech, cat. no. 631317), per the manufacturer's instructions, to generate infectious  
195 lentiviral particles that would direct expression of AcGFP1, KRAS<sup>G12D</sup>, and p53<sup>R167H</sup> mutants in  
196 transduced cells.

197

## 198 **Generation of shRNA-expressing vectors**

199 Short hairpin RNA (shRNA) constructs targeting the porcine SMAD4 and p16 genes  
200 were created using InvivoGen's siRNA Wizard™ software ([www.invivogen.com/sirnazard](http://www.invivogen.com/sirnazard)).

201 Three targeting sequences for each gene along with scrambled controls initially were generated  
202 and tested. The shRNA construct that demonstrated the best target knock-down in preliminary  
203 experimentation (as verified by PCR, data not shown) was utilized for subsequent experiments  
204 (see Table S3 for sequences ultimately selected for the shRNA constructs). Primers were cloned  
205 into the psiRNA-h7SKhygro G1 and psiRNA-h7SKneo G1 vectors (InvivoGen, cat. no. ksirna3-  
206 h21 and ksirna3-n21, respectively; [www.invivogen.com](http://www.invivogen.com)) and plasmids then were isolated, all per  
207 the manufacturer's protocol.

208

## 209 **Cell transformations**

210 Primary porcine pancreatic epithelial cells in T75 flasks were grown to 80% confluency  
211 under standard conditions. The media then was exchanged with 2-3 mL of supernatant from non-  
212 lysed Lenti-X™ 293T cells (containing GKP viral particles) with 2 µg/mL polybrene (cat. no.  
213 TR1003, Thermo Fisher Scientific). After 24-48 h at 37°C, treated epithelial cells were re-seeded  
214 into 6-well plates under standard conditions and grown to 80% confluency. An exchange with  
215 whole media containing 2 µg/mL G418 aminoglycoside antibiotic then was performed; the G418  
216 dose was chosen based on preliminary dose-response studies against non-treated epithelial cells.  
217 After 24 h, a whole media exchange was done, and the presence of transduced cells was  
218 determined with inverted GFP fluorescent microscopy of living cells. Subsequent transfections  
219 for RNAi were done with the above plasmids employing shRNA sequences against SMAD4  
220 and/or p16, and using the LyoVec™ reagent (InvivoGen, cat. no. lyec-12), all per the  
221 manufacturer's protocol. Transfected cells then were selected for expression of the shRNA  
222 vector using the appropriate aminoglycoside antibiotic (G418 or hygromycin B).

223

## 224 **PCR**

225 Cell and tissue RNA was isolated using the QIAGEN RNEasy Mini Kit. Purified RNA  
226 then was used to generate cDNA using the Verso cDNA Synthesis Kit. The Platinum® Blue  
227 PCR Supermix (Invitrogen™/Life Technologies, cat. no. 12580) subsequently was used for all  
228 PCR reactions. Amplified products were separated with agarose gel electrophoresis, and then  
229 visualized using a UV-light box. qPCR was performed using the PowerUp™ SYBR® Green  
230 Master Mix (Applied Biosystems™/ Thermo Fisher Scientific, cat. no. A25741) per  
231 manufacturer's protocol, and run on an Applied Biosystems™ 7500 Fast Dx Real-Time PCR  
232 Instrument. Fold changes in gene expression were calculated using the comparative  $C_T$  method  
233 [30]. All primers used are listed in Table S3.

234

## 235 **Immunoblotting**

236 Western blot analysis was performed to confirm overexpression of the mutant p53 protein  
237 (see Table S4 for a list of antibodies used), as previously described [31]. An antibody specific for  
238 the mutant KRAS protein was not commercially available. Antibody expression was visualized  
239 using the Li-Cor Odyssey Electrophoresis Imaging System ([www.licor.com](http://www.licor.com)).

240

## 241 **Soft agar assay**

242 A standard soft agar assay [32] was used to determine anchorage independent growth. A  
243 base layer of 1% agarose was plated into 6-well plates. A total of 2,500 cells/well were mixed  
244 with 0.7% agarose and plated on top of the base layer. The plates were incubated under standard  
245 conditions for 21 days. The cells then were stained with crystal violet, and counted using an



246 inverted microscope. Cells were plated in triplicate, and total counts from all three wells were  
247 averaged.

248

## 249 **Migration assay**

250 A standard scratch assay (monolayer wounding) [33] was performed to determine cellular  
251 migration rate. Cells were plated in triplicate into 6-well plates. A horizontal scratch using a 10  
252  $\mu$ L pipet tip was made in each well. After washing away scratched-off cells, baseline images  
253 along the scratch were obtained, the plates were incubated under standard conditions, and  
254 subsequent images were captured at 3, 6, 9, 12, and 15 h after the initial scratch. ImageJ software  
255 ([imagej.nih.gov/ij](http://imagej.nih.gov/ij)) was used to measure the distance between the two migrating cellular fronts  
256 (scratch edges) at 3-5 locations along the scratch. Average distance at each time point was  
257 plotted to generate the migratory rate ( $\mu\text{m/h}$ ).

258

## 259 **Invasion assay**

260 BioCoat™ Matrigel™ Invasion Chambers (Corning™, Thermo Fisher Scientific, cat. no.  
261 08-774) were plated with 50,000 cells (upper chamber) in triplicate, and incubated under  
262 standard conditions for 24 h. The media from the upper chamber then was removed, and any  
263 cells remaining in the upper chamber were removed using a cotton swab. Cells that had migrated  
264 to the bottom of the membrane were stained using a Kwik-Diff™ kit (Shandon™, Thermo Fisher  
265 Scientific, cat. no. 9990701). Membranes were mounted onto glass slides, and cells per high-  
266 power field were counted using ImageJ software.

267

## 268 **Population doubling assay**

269 Cells were plated in 6-well plates (20,000 cell/well), and cultured under standard  
270 conditions. Triplicate plates then were trypsinized on days 1, 2, 3, 4, 6, and 8, and cells were  
271 counted with a hemocytometer. Cell number vs. day was plotted to determine the day range in  
272 which linear growth was achieved. The data from this linear growth phase were used to  
273 determine population doubling time (DT) using the formula:  $DT = (\Delta t) \times \ln(2) \div \ln(N_f/N_i)$   
274 where  $\Delta t$  = time interval between initial and final cell count,  $N_f$  = cell count at final time, and  $N_i$   
275 = cell count at initial time.

276

## 277 **Proliferation assay**

278 Relative cell proliferation rates were assayed using an MTT (3-(4,5-dimethylthiazol-2-  
279 yl)-2,5-diphenyltetrazolium bromide) assay kit (Vybrant™ MTT Cell Proliferation Assay Kit,  
280 Invitrogen™, Thermo Fisher Scientific, cat. no. V13154). Cells were plated in triplicate in a 96-  
281 well plate (5,000 cell/well), and cultured under standard conditions for 48 h. MTT reagent then  
282 was added to the cells per the manufacturer's instructions, followed by addition of the solvent  
283 solution 3.5 h later. Absorbance was measured with a plate reader 3.5 h after solvent addition.  
284 Mean absorbance was normalized to absorbance from wild type pancreatic ductal epithelial cells  
285 to calculate fold-difference in proliferation.

286

## 287 **Immunofluorescence and immunohistochemistry**

288 Antibodies used in immunofluorescent and immunohistochemical experiments are listed  
289 in Table S4. Agilent Dako EnVision kits ([www.agilent.com](http://www.agilent.com)) were used for all IHC analyses per  
290 the manufacturer's instructions.

291

## 292 **Subcutaneous tumorigenic cell injection**

293 Subcutaneous implantation of tumorigenic cells was performed as previously described  
294 [34], with some modifications. Transformed porcine pancreatic ductal epithelial cells (the three  
295 lineages described in Table 1) were trypsinized, counted, and resuspended in DMEM at a  
296 concentration of  $1 \times 10^7$  viable cells/mL. Nude mice (N = 30; 100% female; maintained in  
297 microisolator cages with soft bedding and fed regular chow) were randomized into three  
298 treatment groups (representing each transformed cell line in Table 1; N = 10 mice per group,  
299 100% female) using an online randomization tool. Mice then were injected with  $5 \times 10^6$  cells  
300 (500  $\mu$ L) into the right hind flank under brief isoflurane inhalational anesthesia, administered  
301 with a Matrx VMS® small animal anesthesia machine, within a small animal operating room.  
302 Tumors were allowed to grow for 6 weeks or until they reached 2 cm in diameter, as measured  
303 with a caliper, and then subjects were euthanized using an AVMA-approved [28] method of CO<sub>2</sub>  
304 asphyxiation. At necropsy all gross tumor was measured and collected, portions underwent  
305 formalin fixation and paraffin embedding, and sections subsequently underwent H&E or  
306 immunohistochemical staining as described above. An independent, a blinded pathologist  
307 analyzed the stained sections to determine whether tumors were epithelial in origin, and if they  
308 displayed malignant features.

309

## 310 **Orthotopic tumorigenic cell injection**

311 Orthotopic implantation of tumorigenic cells was performed as previously described [34]  
312 to analyze metastases and desmoplasia. In brief, transformed porcine pancreatic ductal epithelial  
313 cells (the three lineages described in Table 1) were trypsinized and counted, and  $1 \times 10^4$  viable  
314 cells were suspended into 20  $\mu$ L DMEM. Nude mice (N = 36; 100% female) housed as described

315 above were randomized into three treatment groups (representing each transformed cell line in  
316 Table 1; N = 12 per group, 100% female) using an online randomization tool. The 20  $\mu$ L cell  
317 suspension then was injected with a 20-gauge needle into the pancreas of each nude mouse  
318 through a 5 mm incision in the left upper quadrant, under isoflurane anesthesia within a small  
319 animal operating room. Mice were euthanized 6 weeks after injection using CO<sub>2</sub> asphyxiation as  
320 described above, and tumors and organs were harvested for gross and histologic analysis, as  
321 described in the previous paragraph.

322

## 323 **Statistics and power analysis**

324 Data are reported as mean  $\pm$  standard deviation. Groups of continuous data were  
325 compared with ANOVA and the unpaired t-test. Categorical data were compared with the Fisher  
326 or Chi square test. For the power analysis of the murine subcutaneous tumor implant assay,  
327 tumor diameter was selected as the endpoint. Setting alpha = 0.05 and power = 0.8, ten mice per  
328 group were needed across three groups to detect a difference in means of 30% with the standard  
329 deviation estimated at 20% of the mean. In the orthotopic implantation assay, N = 10 mice per  
330 treatment group across three treatment groups were needed to detect a 100% difference in effect  
331 (+tumor) at a single metastatic site (with alpha set at 0.05 and power = 0.8); or, combining all  
332 seven metastatic sites together, N = 10 mice per group were needed to detect a 40% difference in  
333 effect.

## 334 **Results**

335

### 336 **Isolation of primary porcine pancreatic ductal epithelial cells**

337 Cells cultured from micro-dissected pancreatic ducts displayed epithelial morphology  
338 under phase microscopy and stained for CK19 (an established marker of pancreatic ductal  
339 epithelium [35]; **Fig. 1A-B**). Based on these results, we were confident that we had a population  
340 of pancreatic epithelial cells that we could use to generate tumorigenic cell lines.

341

### 342 **Generation of tumorigenic cell lines**

343 In order to transform our primary porcine pancreatic ductal epithelial cells, we first  
344 generated a lentiviral construct containing *KRAS*<sup>G12D</sup> and *TP53*<sup>R167H</sup>, genes previously identified  
345 [29] as the porcine equivalents to the mutant *KRAS* and *TP53* which are present in multiple  
346 human cancers [36-40]; in the mouse, expression of these mutants was the basis for the  
347 *KRAS/p53* genetically engineered murine model of pancreatic cancer [41]. For our model, we  
348 chose to use a lentiviral platform for the vector, because its genome would be large enough to  
349 accommodate insertion of both mutant genes; in addition, we believed that a lentivirus would be  
350 optimal for transforming primary cells.

351 Since initial sequencing of the porcine genome has been accomplished [42], we were able  
352 to utilize the National Library of Medicine's nucleotide BLAST® database  
353 ([blast.ncbi.nlm.nih.gov/blast.cgi](http://blast.ncbi.nlm.nih.gov/blast.cgi)) to determine the porcine genetic equivalents for human *SMAD4*  
354 and *CDKN2A*. We then designed primers (Table S3) to amplify these two genes from genomic  
355 DNA isolated from skin of a healthy domestic pig. We sequenced our amplification products,

356 and accessed the BLAST® database to confirm that our products aligned with the porcine  
357 *SMAD4* and *CDKN2A* gene sequences. We then proceeded to generate lentiviral constructs to  
358 transform primary porcine pancreatic ductal epithelial cells into cell lines expressing various  
359 combinations of mutant KRAS and p53, SMAD4 shRNA, and p16<sup>Ink4A</sup> shRNA (see cell line  
360 definitions in Table 1), as described under Materials and Methods.

361 Primary porcine epithelial cells next were transduced with the GKP lentivirus to generate  
362 transformed cell lines. Overexpression of KRAS<sup>G12D</sup> and p53<sup>R167H</sup> was confirmed in these cell  
363 lines with qPCR and immunoblotting (**Fig. 1C-E**). Of note, we could not obtain a reliable  
364 antibody to detect porcine KRAS with immunoblotting, so we had to rely on qPCR results and  
365 expression of GFP as markers of KRAS<sup>G12D</sup> expression. Preliminary *in vitro* analyses to probe  
366 the tumorigenic properties of these GKP-transformed cell lines demonstrated modest increases in  
367 soft agar colony formation and migration speed over wild type cells (**Fig. 2A & B**). Interestingly,  
368 the cell line (2.22) with the best performance in the soft agar and migration assays had only  
369 modest overexpression of KRAS<sup>G12D</sup> and p53<sup>R167H</sup> (**Fig. 1 & 2**); in contrast, the cell lines with  
370 the highest mutant overexpression performed relatively poorly in these *in vitro* assays of  
371 “tumorigenesis” (i.e., evidence of transformed behavior in cell culture).

372 While *in vitro* experiments were being performed, *in vivo* pancreatic tumor induction was  
373 attempted utilizing a transgenic mini-pig available from the NSRRC. Known as the “Oncopig,”  
374 [26], this subject carries an LSL-cassette containing the dominant negative *TP53*<sup>R167H</sup> and the  
375 activated *KRAS*<sup>G12D</sup> sequences [26,43,44]; i.e., this subject is the porcine analog of the  
376 KRAS/p53 mouse [41,45]. As demonstrated previously, site-specific expression of Cre  
377 recombinase in the Oncopig resulted in localized p53 inhibition and KRAS activation, while  
378 subcutaneous injection of AdCre produced mesenchymal tumors at the injection sites [26]. We

379 injected Cre recombinase into the pancreas of five Oncopigs (**Protocol S2; Fig. S2; Tables S5**  
380 **and S6**). After four months, we observed no gross tumors. However, there was  
381 immunohistochemical evidence of transgene expression at the pancreatic injection sites along  
382 with numerous microscopic proliferative lesions with desmoplastic features (**Fig. S2**).

383 Based on the modest evidence of *in vitro* transformation and the lack of gross *in vivo*  
384 tumorigenesis using expression of p53<sup>R167H</sup> and KRAS<sup>G12D</sup> only, we decided that additional  
385 oncogenic stress might be helpful to increase the tumor-like properties of transformed pancreatic  
386 ductal epithelial cells. Utilizing cell line 2.22 (hereafter referred to PGKP; see Table 1), which  
387 had relatively good performance in the soft agar and migration assays (**Fig. 2A & B**), sequential  
388 transduction with lentiviral constructs expressing shRNA against SMAD4 and then p16<sup>Ink4A</sup> was  
389 performed to generate cell lines PGKPS and PGKPSC (see Table 1), respectively. RT-PCR then  
390 was used to confirm knockdown of the targeted transcripts in these two cell lines (**Fig. 2C**).

391

## 392 ***In vitro* tumorigenic properties of transformed cells**

393 The *in vitro* “tumorigenic” properties of the PGKP, PGKPS, and PGKPSC cell lines first  
394 were compared with the soft agar and migration assays (**Fig. 2D & E**). Addition of SMAD4 ±  
395 p16<sup>Ink4A</sup> knockdown enhanced the ability of transformed cells to form colonies in soft agar and  
396 increased their migration speed (2D wounding assay), particularly when both transcripts were  
397 targeted (i.e., the PGKPSC line). We then compared population doubling time, proliferation  
398 (metabolic dye conversion), and Matrigel® invasion ability among the three transformed lines  
399 with respect to wild type cells (**Fig. 3A-C**). Both the PGKPS and PGKPSC cell lines had greater  
400 proliferation and invasive ability compared to either wild type cells or the PGKP cell line (**Fig.**  
401 **3B, C**). The doubling time for all three transformed cell lines was approximately the same at ~15

402 h, compared to the ~4 d doubling time of wild type cells (**Fig. 3A**). Based on the *in vitro* assays  
403 of tumorigenesis, we suspected that all three of our transformed cell lines had the potential to  
404 form tumors *in vivo*, albeit to varying degrees. We subsequently decided to compare the *in vivo*  
405 tumorigenicity among all three cell lines in an immunodeficient mouse model.

## 407 **Subcutaneous and orthotopic tumor transplants in immunodeficient** 408 **mice**

409 In order to determine if our cell lines retained their tumorigenic properties *in vivo*, we  
410 utilized homozygous athymic mice to generate subcutaneous and orthotopic cell implantation  
411 models. The subcutaneous model was used to assess *in vivo* tumor growth. All three cell lines  
412 grew sizeable tumors (>1 cm diameter) within 6 weeks; growth rates were not statistically  
413 different among the three cell lines (**Fig. 4A & B**). The subcutaneous tumors were well-  
414 vascularized and mucinous in gross appearance (**Fig. 4A**). Confirmation of GKP lentiviral  
415 transduction was demonstrated with immunohistochemistry of the p53<sup>R167H</sup> mutant in  
416 subcutaneous tumors (**Fig. S3**).

417 Tumors from the subcutaneous implant model then underwent immunohistochemical  
418 staining with an array of epithelial and mesenchymal markers (**Fig. 5**). The distribution of  
419 staining for the epithelial markers (E-cadherin, epithelial cell adhesion molecule, pan-  
420 cytokeratin, cytokeratin-19) generally was more diffuse than the mesenchymal marker staining.  
421 In some regions the epithelial marker staining was clustered and intense. The overall abundance  
422 of staining for the epithelial markers appeared greater in the PGKPS and PGKPSC lines with  
423 respect to the PGKP line. The distribution of staining for the mesenchymal markers ( $\alpha$ -smooth  
424 muscle actin, vimentin, and type I collagen) was variable, sometimes appearing in cords or



425 strands in some sections, reminiscent of the desmoplastic reaction in human pancreatic cancer  
426 [46,47]. In other sections, mesenchymal marker staining was minimal. Similar to the epithelial  
427 markers, the overall abundance of staining for the mesenchymal markers appeared greater in the  
428 PGKPS and PGKPSC lines compared to the PGKP line.

429 With the immunohistochemical studies of the subcutaneous tumors demonstrating some  
430 epithelial characteristics, the nude mouse orthotopic implantation model was used next to assess  
431 the metastatic potential of all three cell lines. The percentage of mice implanted with each cell  
432 line that subsequently developed metastasis in the small bowel, diaphragm, liver, lung, lymph  
433 node, peritoneum, or spleen is shown in **Fig. 4C**. The degree of metastatic spread was minimal;  
434 nodal tissue was the only metastatic site common to all three lines. The PGKPCS cell line  
435 exhibited the greatest array of metastatic spread ( $p < 0.002$ , Chi-square), with the most common  
436 site being the spleen (though it was not clear in two of five mice with splenic disease after  
437 PGKPSC implantation whether the spleen was involved with extension from the primary tumor,  
438 or from direct seeding, or whether these were true metastases). Interestingly, one of the two  
439 subjects with liver metastasis after PGKPSC implantation had primary tumor within the  
440 gallbladder, rather than within the pancreas. Similar to the subcutaneous tumor model, most  
441 tumors in the orthotopic model were well-vascularized and mucinous in gross appearance.

442

443

444

445

## Discussion

446

447

448

449

450

451

452

453

454

455

456

457

458

459

Our overall goal with this project was to generate tumorigenic pancreatic cell lines that could be used in an immunocompetent porcine model of pancreatic cancer. Current murine models for pancreatic cancer will continue to be helpful, particularly for the study of molecular mechanisms. However, murine models are limited in their ability to replicate human biology and size, so a large animal model of pancreatic cancer likely would enhance our ability to develop and test new diagnostic and treatment modalities for this disease. The data presented herein demonstrated that wild type porcine pancreatic ductal epithelium can be transformed with modulation of common tumor-associated target genes, and that these transformed cells subsequently can grow tumors in immunodeficient mice. These data provide a pathway for the construction of an autochthonous porcine model of pancreatic cancer, namely, orthotopic implantation of tumorigenic pancreatic cells. Proof-of-principle for tumor growth in pigs using subcutaneous implantation of *ex-vivo* transformed autologous fibroblasts was demonstrated in 2007 [29].

460

461

462

463

464

465

466

Porcine biomedical models have been used for decades in the fields of trauma and hemostasis [48], xenotransplantation [49,50], dermal healing [51], toxicology [52], atherosclerosis [53], and cardiac regeneration [54]; the utility of these models is growing. A porcine genome map was generated in 2012 [42], and further coverage, annotation, and confirmation is ongoing [55,56]. Porcine-centered online tools and databases are now available [57]. Genetic manipulation of pigs (including knockouts, tissue-specific transgenics, inducible expression [29,58-65]) with similar tools as used in the mouse is becoming more routine, with

467 new gene-edited porcine models emerging in 2015-2017 for diseases such as atherosclerosis,  
468 cystic fibrosis, Duchenne muscular dystrophy, and ataxia telangiectasia [44,66,67].

469 The rationale to build a porcine model of pancreatic cancer is (1) to have a platform for  
470 diagnostic/therapeutic device development otherwise not achievable in murine models; and (2) to  
471 have a highly predictive preclinical model in which anti-cancer therapies (including  
472 immunotherapies) could be vetted/optimized prior to a clinical trial [68]. The rationale to use the  
473 pig in this modeling effort is that this species mimics human genomics [55,69-72], epigenetics  
474 [73], physiology [52,69,74,75], metabolism [69,75,76], inflammation and immune response  
475 [72,77-81], and size [75,82] remarkably well (in particular, better than mice), with reasonable  
476 compromises towards cost and husbandry [75]. So based on the pig's relatively large size and its  
477 proven track record in replicating human biology which, incidentally, is a demonstrably better  
478 replication than can be obtained with rodents, we selected swine as the model organism for this  
479 pancreatic cancer project.

480 Research on immunocompetent large animal cancer models [83-85] includes prostate  
481 cancer, for which there is a canine model [86]. In addition, in 2012 a group in Munich reported  
482 the engineering of (i) an *APC* mutant pig that developed rectal polyposis [16,87] and (ii) a pig  
483 with Cre-inducible p53 deficiency [63]. This group subsequently determined that their p53-null  
484 subjects (*TP53*<sup>R167H/R167H</sup>) developed osteosarcoma by age 7-8 months [88]. Other p53-deficient  
485 pigs have been engineered since this initial report [64,89]; in the report from Iowa, half (5 out of  
486 10) of p53-deficient (*TP53*<sup>R167H/R167H</sup>) pigs developed lymphoma or osteogenic tumor at age 6-18  
487 months [64]. A group in Denmark reported the creation of a *BRCA* mutant pig in 2012. [90].

488 A KRAS/p53 "Oncopig" was reported in 2015 [26,43,44,84]. This subject has a somatic  
489 LSL-cassette that can express dominant negative p53 (R167H mutation) and activated KRAS

490 (G12D mutation); i.e., the porcine analog of the KRAS/p53 mouse [41,45]. Site-specific  
491 expression of Cre recombinase in the Oncopig resulted in localized p53 inhibition and KRAS  
492 activation; subcutaneous injection of AdCre produced mesenchymal tumors at the injection sites  
493 [26]. In 2017, initial work was published on a Oncopig-based model of hepatocellular carcinoma  
494 [91]. Also in 2017, another genetic porcine model of intestinal neoplasia was reported [92],  
495 utilizing inducible expression of KRAS<sup>G12D</sup>, c-Myc, SV40 large T antigen, and retinoblastoma  
496 protein (pRb). One out of three pigs total in this model developed duodenal neuroendocrine  
497 carcinoma with lymph node metastasis at two months after induction. A porcine model of  
498 pancreatic cancer has not yet been reported, other than some preliminary data presented by us in  
499 2017 [93].

500           The process we used for developing transformed porcine pancreatic ductal epithelial cell  
501 lines for future orthotopic implantation was somewhat iterative, in that we modified our strategy  
502 along the way based on our early results. Commonly mutated genes in pancreatic cancer include  
503 *KRAS* [94,95] and *TP53* [95-97]. In mice, somatic activation of KRAS via the G12D mutation  
504 (*KRAS*<sup>G12D</sup>) produced widely metastatic pancreatic tumors; survival duration in these subjects  
505 decreased further with p53 inactivation [41]. Based on this murine model, and the published  
506 success with subcutaneous tumor induction in the KRAS/p53 Oncopig [26], we elected to  
507 transform pancreatic ductal epithelial cells with expression of activated KRAS<sup>G12D</sup> and p53<sup>R167H</sup>  
508 only. However, the initial results from our *in vitro* transformation assays with these two gene  
509 edits (i.e., the PGKP cell line of Table 1) were somewhat underwhelming. Combined with the  
510 finding of no gross tumor four months after pancreatic AdCre injection in five Oncopig subjects,  
511 we decided that additional genetic “hits” might be necessary for transformation of porcine  
512 pancreatic ductal epithelial cells. Of note, Schook et al. [29] found that porcine dermal

513 fibroblasts required six genetic edits (human telomerase reverse transcriptase, dominant negative  
514 p53, cyclin D1, activated cyclin dependent kinase, oncogenic c-Myc, and oncogenic H-Ras) to  
515 optimize the tumorigenic phenotype of this particular cell.

516 Other commonly mutated genes in pancreatic cancer include *SMAD4* [95,98] and  
517 *CDKN2A* [95,99]. Deletion of *SMAD4* or *CDKN2A* in a *KRAS*<sup>G12D</sup> murine pancreatic cancer  
518 model enhanced tumor growth [100,101]. Based on these published data and our above  
519 transformation results with just the *KRAS* and *TP53* edits, we elected to add knockdown of  
520 *SMAD4* and p16 to our list of hits for transformation of porcine pancreatic ductal epithelial cells.  
521 Ultimately, all three of our cell lines (Table 1) demonstrated transformed behavior *in vitro* and  
522 the ability to form tumors *in vivo* (nude mice), with perhaps some enhancement by the addition  
523 of *SMAD4* and p16 knockdown. In the future, we intend to utilize CRISPR/Cas9 editing to  
524 disrupt the genes of these and/or other targets.

525 Although we utilized a relatively high number of cells to obtain tumor formation in our  
526 nude mice experiments, we feel that this is due to the relative young age of our cell lines, which  
527 did not undergo as many passages as other cell lines which have been used to study pancreatic  
528 cancer. Thus, the transformed cell lines in this report likely did not undergo an inadvertent  
529 selection for the fastest growing cells, as may occur in older, extensively-passaged lines.  
530 Regarding the lack of desmoplasia in our murine xenograft model, we did not consider this  
531 surprising, in that most immunodeficient murine models of pancreatic cancer do not recapitulate  
532 the extent of desmoplasia or metastasis seen with human disease. We anticipate that future  
533 experiments involving the implantation of transformed pancreatic ductal epithelial cells into wild  
534 type swine (and thus into a “normal” microenvironment with “normal” immunoediting) will  
535 produce tumors with desmoplasia and metastasis.

536           Of note, the pathologic findings in our five Oncopig subjects, while not macroscopically  
537 tumorous, displayed tissue architecture reminiscent of desmoplasia. Regarding the lack of  
538 macroscopic tumor in these transgenic pigs, it is conceivable that the induction process was not  
539 optimal secondary to an inadequate dose of AdCre, inadequate recombinase activity, inadequate  
540 tissue delivery of the enzyme, or some other technical issue. Our future plans in this respect will  
541 involve additional attempts at induction of pancreatic tumor in the Oncopig with and without  
542 introduction of some additional gene edits, such as local disruption of *SMAD4* and *CDKN2A*  
543 (e.g., with *in vivo* CRISPR/Cas9 gene editing [102,103]).

544  
545  
546  
547  
548  
549  
550  
551  
552  
553  
554  
555  
556  
557  
558  
559  
560  
561  
562  
563  
564

## References

1. American Cancer Society. *Cancer Facts & Figures 2016*. Atlanta: American Cancer Society; 2016. Available from: <http://www.cancer.org/research/cancerfactsstatistics/cancerfactsfigures2016/index>.
2. *SEER (Surveillance, Epidemiology, and End Results Program) Stat Fact Sheets: Pancreas Cancer*. National Cancer Institute. Accessed December 12, 2016. URL: <http://seer.cancer.gov/statfacts/html/pancreas.html>.
3. National Comprehensive Cancer Network. Pancreatic Adenocarcinoma, Version 1.2018. In: NCCN Clinical Practice Guidelines In Oncology (NCCN Guidelines®). NCCN; 27 April 2018. Available from: [www.nccn.org](http://www.nccn.org).
4. Seok J, Warren HS, Cuenca AG, Mindrinos MN, Baker HV, Xu W, et al. Genomic responses in mouse models poorly mimic human inflammatory diseases. *PNAS* 2013; 110(9): 3507-12. PMID: 23401516. doi: 10.1073/pnas.1222878110.
5. Begley CG, Ellis LM. Drug development: Raise standards for preclinical cancer research. *Nature* 2012; 483(7391): 531-3. PMID: 22460880. doi: 10.1038/483531a.
6. Cook N, Jodrell DI, Tuveson DA. Predictive in vivo animal models and translation to clinical trials. *Drug Discov Today* 2012; 17(5-6): 253-60. PMID: 22493784. doi: 10.1016/j.drudis.2012.02.003.
7. Le Magnen C, Dutta A, Abate-Shen C. Optimizing mouse models for precision cancer prevention. *Nat Rev Cancer* 2016; 16(3): 187-96. PMID: 26893066. doi: 10.1038/nrc.2016.1.

- 565 8. Reichert JM, Wenger JB. Development trends for new cancer therapeutics and vaccines.  
566 *Drug Discov Today* 2008; 13(1-2): 30-7. PMID: 18190861. doi:  
567 10.1016/j.drudis.2007.09.003.
- 568 9. Sharpless NE, Depinho RA. The mighty mouse: genetically engineered mouse models in  
569 cancer drug development. *Nat Rev Drug Discov* 2006; 5(9): 741-54. PMID: 16915232.  
570 doi: 10.1038/nrd2110.
- 571 10. Ebos JM, Kerbel RS. Antiangiogenic therapy: impact on invasion, disease progression,  
572 and metastasis. *Nat Rev Clin Oncol* 2011; 8(4): 210-21. PMID: 21364524. doi:  
573 10.1038/nrclinonc.2011.21.
- 574 11. Francia G, Cruz-Munoz W, Man S, Xu P, Kerbel RS. Mouse models of advanced  
575 spontaneous metastasis for experimental therapeutics. *Nat Rev Canc* 2011; 11(2): 135-41.  
576 PMID: 21258397. doi: doi:10.1038/nrc3001.
- 577 12. O'Collins VE, Macleod MR, Donnan GA, Horky LL, van der Worp BH, Howells DW.  
578 1,026 experimental treatments in acute stroke. *Ann Neurol* 2006; 59(3): 467-77. PMID:  
579 16453316. doi: 10.1002/ana.20741.
- 580 13. Scott S, Kranz JE, Cole J, Lincecum JM, Thompson K, Kelly N, et al. Design, power,  
581 and interpretation of studies in the standard murine model of ALS. *Amyotroph Lat Scler*  
582 2008; 9(1): 4-15. PMID: 18273714. doi: 10.1080/17482960701856300.
- 583 14. Talmadge JE, Singh RK, Fidler IJ, Raz A. Murine models to evaluate novel and  
584 conventional therapeutic strategies for cancer. *Am J Pathol* 2007; 170(3): 793-804.  
585 PMID: 17322365. doi: 10.2353/ajpath.2007.060929.



- 586 15. Rogers CS, Stoltz DA, Meyerholz DK, Ostedgaard LS, Rokhlina T, Taft PJ, et al.  
587 Disruption of the CFTR gene produces a model of cystic fibrosis in newborn pigs.  
588 *Science* 2008; 321(5897): 1837-41. PMID: 18818360. doi: 10.1126/science.1163600.
- 589 16. Flisikowska T, Merkl C, Landmann M, Eser S, Rezaei N, Cui X, et al. A porcine model  
590 of familial adenomatous polyposis. *Gastroenterology* 2012; 143: 1173-5. PMID:  
591 22864254. doi: 10.1053/j.gastro.2012.07.110.
- 592 17. Pezzulo AA, Tang XX, Hoegger MJ, Abou Alaiwa MH, Ramachandran S, Moninger TO,  
593 et al. Reduced airway surface pH impairs bacterial killing in the porcine cystic fibrosis  
594 lung. *Nature* 2012; 487(7405): 109-13. PMID: 22763554. doi: 10.1038/nature11130.
- 595 18. Maddalo D, Manchado E, Concepcion CP, Bonetti C, Vidigal JA, Han YC, et al. In vivo  
596 engineering of oncogenic chromosomal rearrangements with the CRISPR/Cas9 system.  
597 *Nature* 2014; 516(7531): 423-7. PMID: 25337876. doi: 10.1038/nature13902.
- 598 19. Sanchez-Rivera FJ, Papagiannakopoulos T, Romero R, Tammela T, Bauer MR, Bhutkar  
599 A, et al. Rapid modelling of cooperating genetic events in cancer through somatic  
600 genome editing. *Nature* 2014; 516(7531): 428-31. PMID: 25337879. doi:  
601 10.1038/nature13906.
- 602 20. Day CP, Merlino G, Van Dyke T. Preclinical mouse cancer models: a maze of  
603 opportunities and challenges. *Cell* 2015; 163(1): 39-53. PMID: 26406370. doi:  
604 10.1016/j.cell.2015.08.068.
- 605 21. Singh M, Murriel CL, Johnson L. Genetically engineered mouse models: closing the gap  
606 between preclinical data and trial outcomes. *Cancer Res* 2012; 72(11): 2695-700. PMID:  
607 22593194. doi: 10.1158/0008-5472.CAN-11-2786.

- 608 22. Zitvogel L, Pitt JM, Daillere R, Smyth MJ, Kroemer G. Mouse models in  
609 oncoimmunology. *Nat Rev Cancer* 2016; 16(12): 759-73. PMID: 27687979. doi:  
610 10.1038/nrc.2016.91.
- 611 23. Kilkenny C, Browne WJ, Cuthill IC, Emerson M, Altman DG. Improving bioscience  
612 research reporting: the ARRIVE guidelines for reporting animal research. *PLoS Biol*  
613 2010; 8(6): e1000412. PMID: 20613859. doi: 10.1371/journal.pbio.1000412.
- 614 24. National Institutes of Health. *Principles and Guidelines for Reporting Preclinical*  
615 *Research*. Accessed 5 February 2016. [https://www.nih.gov/research-training/rigor-](https://www.nih.gov/research-training/rigor-reproducibility/principles-guidelines-reporting-preclinical-research)  
616 [reproducibility/principles-guidelines-reporting-preclinical-research](https://www.nih.gov/research-training/rigor-reproducibility/principles-guidelines-reporting-preclinical-research).
- 617 25. National Institutes of Health. *Enhancing Reproducibility through Rigor and*  
618 *Transparency*. NOT-OD-15-103. June 9, 2015. [http://grants.nih.gov/grants/guide/notice-](http://grants.nih.gov/grants/guide/notice-files/NOT-OD-15-103.html)  
619 [files/NOT-OD-15-103.html](http://grants.nih.gov/grants/guide/notice-files/NOT-OD-15-103.html)
- 620 26. Schook LB, Collares TV, Hu W, Liang Y, Rodrigues FM, Rund LA, et al. A Genetic  
621 Porcine Model of Cancer. *PLOS ONE* 2015; 10(7): e0128864. PMID: 26132737. doi:  
622 10.1371/journal.pone.0128864.
- 623 27. Committee for the Update of the Guide for the Care and Use of Laboratory Animals.  
624 *Guide for the Care and Use of Laboratory Animals*. Washington, DC: The National  
625 Academies Press; 2011.
- 626 28. American Veterinary Medical Association Panel on Euthanasia. *AVMA Guidelines for the*  
627 *Euthanasia of Animals*. Schaumburg, IL: American Veterinary Medical Association;  
628 2013.

- 629 29. Adam SJ, Rund LA, Kuzmuk KN, Zachary JF, Schook LB, Counter CM. Genetic  
630 induction of tumorigenesis in swine. *Oncogene* 2007; 26(7): 1038-45. PMID: 16964292.  
631 doi: 10.1038/sj.onc.1209892.
- 632 30. Schmittgen TD, Livak KJ. Analyzing real-time PCR data by the comparative C(T)  
633 method. *Nat Protoc* 2008; 3(6): 1101-8. PMID: 18546601. doi:
- 634 31. Grinnell F, Zhu M, Carlson MA, Abrams JM. Release of mechanical tension triggers  
635 apoptosis of human fibroblasts in a model of regressing granulation tissue. *Exp Cell Res*  
636 1999; 248(2): 608-19. PMID: 10222153. doi: 10.1006/excr.1999.4440.
- 637 32. Macpherson I, Montagnier L. Agar Suspension Culture for the Selective Assay of Cells  
638 Transformed by Polyoma Virus. *Virology* 1964; 23: 291-4. PMID: 14187925. doi:
- 639 33. Liang CC, Park AY, Guan JL. In vitro scratch assay: a convenient and inexpensive  
640 method for analysis of cell migration in vitro. *Nat Protoc* 2007; 2(2): 329-33. PMID:  
641 17406593. doi: 10.1038/nprot.2007.30.
- 642 34. Tsutsumida H, Swanson BJ, Singh PK, Caffrey TC, Kitajima S, Goto M, et al. RNA  
643 interference suppression of MUC1 reduces the growth rate and metastatic phenotype of  
644 human pancreatic cancer cells. *Clin Cancer Res* 2006; 12(10): 2976-87. PMID:  
645 16707592. doi: 10.1158/1078-0432.CCR-05-1197.
- 646 35. Gioviale MC, Damiano G, Montalto G, Buscemi G, Romano M, Lo Monte AI. Isolation  
647 and culture of beta-like cells from porcine Wirsung duct. *Transplant Proc* 2009; 41(4):  
648 1363-6. PMID: 19460560. doi: 10.1016/j.transproceed.2009.02.062.
- 649 36. Govindan R, Ding L, Griffith M, Subramanian J, Dees ND, Kanchi KL, et al. Genomic  
650 landscape of non-small cell lung cancer in smokers and never-smokers. *Cell* 2012;  
651 150(6): 1121-34. PMID: 22980976. doi: 10.1016/j.cell.2012.08.024.

- 652 37. Kandoth C, McLellan MD, Vandin F, Ye K, Niu B, Lu C, et al. Mutational landscape and  
653 significance across 12 major cancer types. *Nature* 2013; 502(7471): 333-9. PMID:  
654 24132290. doi: 10.1038/nature12634.
- 655 38. Stephens PJ, Tarpey PS, Davies H, Van Loo P, Greenman C, Wedge DC, et al. The  
656 landscape of cancer genes and mutational processes in breast cancer. *Nature* 2012;  
657 486(7403): 400-4. PMID: 22722201. doi:
- 658 39. Vogelstein B, Papadopoulos N, Velculescu VE, Zhou S, Diaz LA, Jr., Kinzler KW.  
659 Cancer genome landscapes. *Science* 2013; 339(6127): 1546-58. PMID: 23539594. doi:  
660 10.1126/science.1235122.
- 661 40. Waddell N, Pajic M, Patch AM, Chang DK, Kassahn KS, Bailey P, et al. Whole genomes  
662 redefine the mutational landscape of pancreatic cancer. *Nature* 2015; 518: 495-501.  
663 PMID: PMC4523082. doi: 10.1038/nature14169.
- 664 41. Hingorani SR, Wang L, Multani AS, Combs C, Deramautd TB, Hruban RH, et al.  
665 Trp53R172H and KrasG12D cooperate to promote chromosomal instability and widely  
666 metastatic pancreatic ductal adenocarcinoma in mice. *Cancer Cell* 2005; 7(5): 469-83.  
667 PMID: 15894267. doi: 10.1016/j.ccr.2005.04.023.
- 668 42. Groenen MA, Archibald AL, Uenishi H, Tuggle CK, Takeuchi Y, Rothschild MF, et al.  
669 Analyses of pig genomes provide insight into porcine demography and evolution. *Nature*  
670 2012; 491(7424): 393-8. PMID: 23151582. doi: 10.1038/nature11622.
- 671 43. Rodrigues F, Hu W, Rund L, Liang Y, Counter C, Schook L. Development of the "Onco-  
672 Pig": An Inducible Transgenic Porcine Model for Human Cancer [poster]. 2013  
673 Brazilian Genetics Conference; URL:

- 674 [http://www.dbs.illinois.edu/comparativegenomics/userfiles/file/ocnopigPoster\\_Brazilian](http://www.dbs.illinois.edu/comparativegenomics/userfiles/file/ocnopigPoster_Brazilian)  
675 [%20Genetics%20Conference2013.pdf](#).
- 676 44. Conference Proceedings: Swine in Biomedical Research. July 6-8, 2014. Raleigh, NC.
- 677 45. DuPage M, Dooley AL, Jacks T. Conditional mouse lung cancer models using adenoviral  
678 or lentiviral delivery of Cre recombinase. *Nat Protoc* 2009; 4(7): 1064-72. PMID:  
679 19561589. doi: 10.1038/nprot.2009.95.
- 680 46. Bailey JM, Swanson BJ, Hamada T, Eggers JP, Singh PK, Caffery T, et al. Sonic  
681 hedgehog promotes desmoplasia in pancreatic cancer. *Clin Cancer Res* 2008; 14(19):  
682 5995-6004. PMID: 18829478. doi: 10.1158/1078-0432.CCR-08-0291.
- 683 47. Handra-Luca A, Hong SM, Walter K, Wolfgang C, Hruban R, Goggins M. Tumour  
684 epithelial vimentin expression and outcome of pancreatic ductal adenocarcinomas. *Br J*  
685 *Cancer* 2011; 104(8): 1296-302. PMID: 21448168. doi: 10.1038/bjc.2011.93.
- 686 48. Kheirabadi BS, Mace JE, Terrazas IB, Fedyk CG, Estep JS, Dubick MA, et al. Safety  
687 evaluation of new hemostatic agents, smectite granules, and kaolin-coated gauze in a  
688 vascular injury wound model in swine. *J Trauma* 2010; 68(2): 269-78. PMID: 20154537.  
689 doi: 10.1097/TA.0b013e3181c97ef1.
- 690 49. Cooper DK, Ekser B, Ramsoondar J, Phelps C, Ayares D. The role of genetically  
691 engineered pigs in xenotransplantation research. *J Pathol* 2016; 238(2): 288-99. PMID:  
692 26365762. doi: 10.1002/path.4635.
- 693 50. Niu D, Wei HJ, Lin L, George H, Wang T, Lee IH, et al. Inactivation of porcine  
694 endogenous retrovirus in pigs using CRISPR-Cas9. *Science* 2017; 357(6357): 1303-7.  
695 PMID: 28798043. doi: 10.1126/science.aan4187.

- 696 51. Sullivan TP, Eaglstein WH, Davis SC, Mertz P. The pig as a model for human wound  
697 healing. *Wound Repair Regen* 2001; 9(2): 66-76. PMID: 11350644. doi: 10.1046/j.1524-  
698 475x.2001.00066.x.
- 699 52. Swindle MM, Makin A, Herron AJ, Clubb FJ, Jr., Frazier KS. Swine as models in  
700 biomedical research and toxicology testing. *Vet Pathol* 2012; 49(2): 344-56. PMID:  
701 21441112. doi: 10.1177/0300985811402846.
- 702 53. Xiangdong L, Yuanwu L, Hua Z, Liming R, Qiuyan L, Ning L. Animal models for the  
703 atherosclerosis research: a review. *Protein Cell* 2011; 2(3): 189-201. PMID: 21468891.  
704 doi: 10.1007/s13238-011-1016-3.
- 705 54. Gouadon E, Moore-Morris T, Smit NW, Chatenoud L, Coronel R, Harding SE, et al.  
706 Concise Review: Pluripotent Stem Cell-Derived Cardiac Cells, A Promising Cell Source  
707 for Therapy of Heart Failure: Where Do We Stand? *Stem Cells* 2016; 34(1): 34-43.  
708 PMID: 26352327. doi: 10.1002/stem.2205.
- 709 55. Walters E, Wolf E, Whyte J, Mao J, Renner S, Nagashima H, et al. Completion of the  
710 swine genome will simplify the production of swine as a large animal biomedical model.  
711 *BMC Med Genom* 2012; 5(1): 55. PMID: 23151353. doi: 10.1186/1755-8794-5-55.
- 712 56. Schook LB, Collares TV, Darfour-Oduro KA, De AK, Rund LA, Schachtschneider KM,  
713 et al. Unraveling the swine genome: implications for human health. *Annu Rev Anim*  
714 *Biosci* 2015; 3: 219-44. PMID: 25689318. doi: 10.1146/annurev-animal-022114-110815.
- 715 57. Dawson HD, Chen C, Gaynor B, Shao J, Urban JF, Jr. The porcine translational research  
716 database: a manually curated, genomics and proteomics-based research resource. *BMC*  
717 *Genomics* 2017; 18(1): 643. PMID: 28830355. doi: 10.1186/s12864-017-4009-7.

- 718 58. Gun G, Kues WA. Current progress of genetically engineered pig models for biomedical  
719 research. *Biores Open Access* 2014; 3(6): 255-64. PMID: 25469311. doi:  
720 10.1089/biores.2014.0039.
- 721 59. Fan N, Lai L. Genetically modified pig models for human diseases. *J Genet Genomics*  
722 2013; 40(2): 67-73. PMID: 23439405. doi: 10.1016/j.jgg.2012.07.014.
- 723 60. Prather RS, Lorson M, Ross JW, Whyte JJ, Walters E. Genetically engineered pig models  
724 for human diseases. *Annu Rev Anim Biosci* 2013; 1: 203-19. PMID: 25387017. doi:  
725 10.1146/annurev-animal-031412-103715.
- 726 61. Luo Y, Li J, Liu Y, Lin L, Du Y, Li S, et al. High efficiency of BRCA1 knockout using  
727 rAAV-mediated gene targeting: developing a pig model for breast cancer. *Transgenic Res*  
728 2011; 20(5): 975-88. PMID: 21181439. doi: 10.1007/s11248-010-9472-8.
- 729 62. Luo Y, Bolund L, Sorensen CB. Pig gene knockout by rAAV-mediated homologous  
730 recombination: comparison of BRCA1 gene knockout efficiency in Yucatan and  
731 Gottingen fibroblasts with slightly different target sequences. *Transgenic Res* 2012;  
732 21(3): 671-6. PMID: 22020980. doi: 10.1007/s11248-011-9563-1.
- 733 63. Leuchs S, Saalfrank A, Merkl C, Flisikowska T, Edlinger M, Durkovic M, et al.  
734 Inactivation and inducible oncogenic mutation of p53 in gene targeted pigs. *PLoS ONE*  
735 2012; 7(10): e43323. PMID: 23071491. doi: 10.1371/journal.pone.0043323.
- 736 64. Sieren JC, Meyerholz DK, Wang XJ, Davis BT, Newell JD, Jr., Hammond E, et al.  
737 Development and translational imaging of a TP53 porcine tumorigenesis model. *J Clin*  
738 *Invest* 2014; 124(9): 4052-66. PMID: 25105366. doi: 10.1172/JCI75447.

- 739 65. Yang L, Guell M, Niu D, George H, Leshia E, Grishin D, et al. Genome-wide inactivation  
740 of porcine endogenous retroviruses (PERVs). *Science* 2015; 350(6264): 1101-4. PMID:  
741 26456528. doi: 10.1126/science.aad1191.
- 742 66. Beraldi R, Meyerholz D, Savinov A, Kovács A, Weimer J, Dykstra J, et al. Genetic  
743 Ataxia Telangiectasia porcine model phenocopies the multisystemic features of the  
744 human disease. *Biochim Biophys Acta* 2017: ePub ahead of print, 2017 Jul 23. PMID:  
745 28746835. doi: 10.1016/j.bbadis.2017.07.020.
- 746 67. Perleberg C, Kind A, Schnieke A. Genetically engineered pigs as models for human  
747 disease. *Dis Model Mech* 2018; 11(1): dmm030783. PMID: 29419487. doi:  
748 10.1242/dmm.030783.
- 749 68. Segatto NV, Remiao MH, Schachtschneider KM, Seixas FK, Schook LB, Collares T. The  
750 Oncopig Cancer Model as a Complementary Tool for Phenotypic Drug Discovery. *Front*  
751 *Pharmacol* 2017; 8: 894. PMID: 29259556. doi: 10.3389/fphar.2017.00894.
- 752 69. Kuzmuk KN, Schook LB. Pigs as a Model for Biomedical Sciences. In: Rothschild MF,  
753 Ruvinsky A, editors. *The Genetics of the Pig*. Oxfordshire, UK: CABI; 2011. p. 426-44.
- 754 70. Emes RD, Goodstadt L, Winter EE, Ponting CP. Comparison of the genomes of human  
755 and mouse lays the foundation of genome zoology. *Hum Mol Genet* 2003; 12(7): 701-9.  
756 PMID: 12651866. doi: 10.1093/hmg/ddg078.
- 757 71. Dawson HD, McAnulty P, Dayan A, Ganderup N, Hastings K. A comparative assessment  
758 of the pig, mouse and human genomes. In: McAnulty P, Dayan A, Ganderup N, Hastings  
759 K, editors. *The Minipig in Biomedical Research*. Boca Raton, FL: CRC Press; 2012. p.  
760 323-42.



- 761 72. Dawson HD, Smith AD, Chen C, Urban JF, Jr. An in-depth comparison of the porcine,  
762 murine and human inflammasomes; lessons from the porcine genome and transcriptome.  
763 *Vet Microbiol* 2017; 202: 2-15. PMID: 27321134. doi: 10.1016/j.vetmic.2016.05.013.
- 764 73. Schachtschneider KM, Madsen O, Park C, Rund LA, Groenen MA, Schook LB. Adult  
765 porcine genome-wide DNA methylation patterns support pigs as a biomedical model.  
766 *BMC Genomics* 2015; 16: 743. PMID: 26438392. doi: 10.1186/s12864-015-1938-x.
- 767 74. Vodicka P, Smetana K, Jr., Dvorankova B, Emerick T, Xu YZ, Ourednik J, et al. The  
768 miniature pig as an animal model in biomedical research. *Ann N Y Acad Sci* 2005; 1049:  
769 161-71. PMID: 15965115. doi: 10.1196/annals.1334.015.
- 770 75. Swindle MM, Smith AC. *Swine in the Laboratory: Surgery, Anesthesia, Imaging, and*  
771 *Experimental Techniques*. 3rd ed. Boca Raton, FL: CRC Press; 2016.
- 772 76. Spurlock ME, Gabler NK. The development of porcine models of obesity and the  
773 metabolic syndrome. *J Nutr* 2008; 138(2): 397-402. PMID: 18203910. doi:  
774 77. Röthkotter HJ. Anatomical particularities of the porcine immune system--a physician's  
775 view. *Dev Comp Immunol* 2009; 33(3): 267-72. PMID: 18775744. doi:  
776 10.1016/j.dci.2008.06.016.
- 777 78. Bailey M. The mucosal immune system: recent developments and future directions in the  
778 pig. *Dev Comp Immunol* 2009; 33(3): 375-83. PMID: 18760299. doi:  
779 10.1016/j.dci.2008.07.003.
- 780 79. Fairbairn L, Kapetanovic R, Sester DP, Hume DA. The mononuclear phagocyte system  
781 of the pig as a model for understanding human innate immunity and disease. *J Leukoc*  
782 *Biol* 2011; 89(6): 855-71. PMID: 21233410. doi: 10.1189/jlb.1110607.

- 783 80. Meurens F, Summerfield A, Nauwynck H, Saif L, Gerds V. The pig: a model for human  
784 infectious diseases. *Trends Microbiol* 2012; 20(1): 50-7. PMID: 22153753. doi:  
785 10.1016/j.tim.2011.11.002.
- 786 81. Petersen B, Carnwath JW, Niemann H. The perspectives for porcine-to-human  
787 xenografts. *Comp Immunol Microbiol Infect Dis* 2009; 32(2): 91-105. PMID: 18280567.  
788 doi: 10.1016/j.cimid.2007.11.014.
- 789 82. Ferrer J, Scott WE, 3rd, Weegman BP, Suszynski TM, Sutherland DE, Hering BJ, et al.  
790 Pig pancreas anatomy: implications for pancreas procurement, preservation, and islet  
791 isolation. *Transplantation* 2008; 86(11): 1503-10. PMID: 19077881. doi:  
792 10.1097/TP.0b013e31818bfd1.
- 793 83. Flisikowska T, Kind A, Schnieke A. Pigs as models of human cancers. *Theriogenology*  
794 2016; 86(1): 433-7. PMID: 27156684. doi: 10.1016/j.theriogenology.2016.04.058.
- 795 84. Schachtschneider KM, Schwind RM, Newson J, Kinachtchouk N, Rizko M, Mendoza-  
796 Elias N, et al. The Oncopig Cancer Model: An Innovative Large Animal Translational  
797 Oncology Platform. *Front Oncol* 2017; 7: 190. PMID: 28879168. doi:  
798 10.3389/fonc.2017.00190.
- 799 85. Watson AL, Carlson DF, Largaespada DA, Hackett PB, Fahrenkrug SC. Engineered  
800 Swine Models of Cancer. *Front Genet* 2016; 7: 78. PMID: 27242889. doi:  
801 10.3389/fgene.2016.00078.
- 802 86. Ittmann M, Huang J, Radaelli E, Martin P, Signoretti S, Sullivan R, et al. Animal Models  
803 of Human Prostate Cancer: The Consensus Report of the New York Meeting of the  
804 Mouse Models of Human Cancers Consortium Prostate Pathology Committee. *Canc Res*  
805 2013; 73(9): 2718-36. PMID: 23610450. doi: 10.1158/0008-5472.CAN-12-4213.

- 806 87. Stachowiak M, Flisikowska T, Bauersachs S, Perleberg C, Pausch H, Switonski M, et al.  
807 Altered microRNA profiles during early colon adenoma progression in a porcine model  
808 of familial adenomatous polyposis. *Oncotarget* 2017; 8(56): 96154-60. PMID: 29221194.  
809 doi: 10.18632/oncotarget.21774.
- 810 88. Saalfrank A, Janssen KP, Ravon M, Flisikowski K, Eser S, Steiger K, et al. A porcine  
811 model of osteosarcoma. *Oncogenesis* 2016; 5: e210. PMID: 26974205. doi:  
812 10.1038/oncsis.2016.19.
- 813 89. Shen Y, Xu K, Yuan Z, Guo J, Zhao H, Zhang X, et al. Efficient generation of P53  
814 biallelic knockout Diannan miniature pigs via TALENs and somatic cell nuclear transfer.  
815 *J Transl Med* 2017; 15(1): 224. PMID: 29100547. doi: 10.1186/s12967-017-1327-0.
- 816 90. Luo Y, Kofod-Olsen E, Christensen R, Sorensen CB, Bolund L. Targeted genome editing  
817 by recombinant adeno-associated virus (rAAV) vectors for generating genetically  
818 modified pigs. *J Gen Genom* 2012; 39(6): 269-74. PMID: 22749014. doi:  
819 10.1016/j.jgg.2012.05.004.
- 820 91. Schachtschneider K, Schwind R, Darfour-Oduro K, De A, Rund L, Singh K, et al. A  
821 validated, transitional and translational porcine model of hepatocellular carcinoma.  
822 *Oncotarget* 2017: Epub ahead of print, 2017 Jun 29. PMID: 28733541. doi:  
823 10.18632/oncotarget.18872.
- 824 92. Callesen MM, Arnadottir SS, Lyskjaer I, Orntoft MW, Hoyer S, Dagnaes-Hansen F, et al.  
825 A genetically inducible porcine model of intestinal cancer. *Mol Oncol* 2017; 11(11):  
826 1616-29. PMID: 28881081. doi: 10.1002/1878-0261.12136.
- 827 93. Remmers N, Cox J, Grandgenett P, Grunkemeyer J, Rund L, Schook L, et al.  
828 Development of a Porcine Model of Pancreatic Cancer [poster]. Annual Meeting of the

- 829 American Association of Cancer Research; Washington, D.C. April 1-5, 2017.  
830 [http://cancerres.aacrjournals.org/content/77/13\\_Supplement/813.short](http://cancerres.aacrjournals.org/content/77/13_Supplement/813.short)
- 831 94. Smit VT, Boot AJ, Smits AM, Fleuren GJ, Cornelisse CJ, Bos JL. KRAS codon 12  
832 mutations occur very frequently in pancreatic adenocarcinomas. *Nucleic Acids Res* 1988;  
833 16(16): 7773-82. PMID: 3047672. doi:
- 834 95. Jones S, Zhang X, Parsons DW, Lin JC, Leary RJ, Angenendt P, et al. Core signaling  
835 pathways in human pancreatic cancers revealed by global genomic analyses. *Science*  
836 2008; 321(5897): 1801-6. PMID: 18772397. doi: 10.1126/science.1164368.
- 837 96. Muller PA, Vousden KH. p53 mutations in cancer. *Nat Cell Biol* 2013; 15(1): 2-8. PMID:  
838 23263379. doi: 10.1038/ncb2641.
- 839 97. Olivier M, Hollstein M, Hainaut P. TP53 mutations in human cancers: origins,  
840 consequences, and clinical use. *Cold Spring Harbor Perspectives in Biology* 2010; 2(1).  
841 PMID: 20182602. doi: 10.1101/cshperspect.a001008.
- 842 98. Blackford A, Serrano OK, Wolfgang CL, Parmigiani G, Jones S, Zhang X, et al. SMAD4  
843 gene mutations are associated with poor prognosis in pancreatic cancer. *Clin Cancer Res*  
844 2009; 15(14): 4674-9. PMID: 19584151. doi: 10.1158/1078-0432.CCR-09-0227.
- 845 99. Caldas C, Hahn SA, da Costa LT, Redston MS, Schutte M, Seymour AB, et al. Frequent  
846 somatic mutations and homozygous deletions of the p16 (MTS1) gene in pancreatic  
847 adenocarcinoma. *Nat Genet* 1994; 8(1): 27-32. PMID: 7726912. doi: 10.1038/ng0994-27.
- 848 100. Bardeesy N, Cheng KH, Berger JH, Chu GC, Pahler J, Olson P, et al. Smad4 is  
849 dispensable for normal pancreas development yet critical in progression and tumor  
850 biology of pancreas cancer. *Genes Dev* 2006; 20(22): 3130-46. PMID: 17114584. doi:  
851 10.1101/gad.1478706.

- 852 101. Bardeesy N, Aguirre AJ, Chu GC, Cheng KH, Lopez LV, Hezel AF, et al. Both  
853 p16(Ink4a) and the p19(Arf)-p53 pathway constrain progression of pancreatic  
854 adenocarcinoma in the mouse. *Proc Natl Acad Sci U S A* 2006; 103(15): 5947-52. PMID:  
855 16585505. doi: 10.1073/pnas.0601273103.
- 856 102. Wang K, Jin Q, Ruan D, Yang Y, Liu Q, Wu H, et al. Cre-dependent Cas9-expressing  
857 pigs enable efficient in vivo genome editing. *Genome Res* 2017; 27(12): 2061-71. PMID:  
858 29146772. doi: 10.1101/gr.222521.117.
- 859 103. Ryu J, Prather RS, Lee K. Use of gene-editing technology to introduce targeted  
860 modifications in pigs. *J Anim Sci Biotechnol* 2018; 9: 5. PMID: 29423214. doi:  
861 10.1186/s40104-017-0228-7.

862

863

## 864 **Acknowledgements**

865

866 This study is the result of work supported in part with resources and the use of facilities  
867 at the Omaha VA Medical Center (Nebraska-Western Iowa Health Care System). Portions of this  
868 study were presented at the 108th Annual Meeting of the American Association for Cancer  
869 Research (AACR) in Washington, D.C., April 1-5, 2017. The authors would like to acknowledge  
870 the technical assistance of Gerri Siford, Chris Hansen, Kelly O'Connell, and Tom Caffrey. The  
871 authors also would like to thank Dr. Lawrence B. Schook and Dr. Laurie A. Rund at the  
872 University of Illinois for the gift of their plasmid that contained the *KRAS*<sup>G12D</sup> mutation, along  
873 with comments, insights and suggestions for its use in this project. Datasets from this manuscript  
874 will be freely shared upon request to the senior author (MAC).

875

876

877

## Author Contributions

| Contributor Role       | Description                                                                                                                                                                                                    | Author                     |
|------------------------|----------------------------------------------------------------------------------------------------------------------------------------------------------------------------------------------------------------|----------------------------|
| Conceptualization      | Ideas; formulation or evolution of overarching research goals and aims.                                                                                                                                        | MAC                        |
| Data Curation          | Management activities to annotate (produce metadata), scrub data and maintain research data (including software code, where it is necessary for interpreting the data itself) for initial use and later reuse. | NR, JLC, JAG, SA           |
| Formal Analysis        | Application of statistical, mathematical, computational, or other formal techniques to analyze or synthesize study data.                                                                                       | NR, MAC, SA                |
| Funding Acquisition    | Acquisition of the financial support for the project leading to this publication.                                                                                                                              | MAC                        |
| Investigation          | Conducting a research and investigation process, specifically performing the experiments, or data/evidence collection.                                                                                         | NR, JLC, JAG, SA, MAC      |
| Methodology            | Development or design of methodology; creation of models.                                                                                                                                                      | NR, MAH, MAC               |
| Project Administration | Management and coordination responsibility for the research activity planning and execution.                                                                                                                   | MAC                        |
| Resources              | Provision of study materials, reagents, materials, patients, laboratory samples, animals, instrumentation, computing resources, or other analysis tools.                                                       | MAH, SA, MAC               |
| Software               | Programming, software development; designing computer programs; implementation of the computer code and supporting algorithms; testing of existing code components.                                            | na                         |
| Supervision            | Oversight and leadership responsibility for the research activity planning and execution, including mentorship external to the core team.                                                                      | MAH, MAC                   |
| Validation             | Verification, whether as a part of the activity or separate, of the overall replication/reproducibility of results/experiments and other research outputs.                                                     | NR, JLC, JAG, SA           |
| Visualization          | Preparation, creation and/or presentation of the published work, specifically visualization/data presentation.                                                                                                 | NR, MAC                    |
| Draft Preparation      | Creation and/or presentation of the published work, specifically writing the initial draft (including substantive translation).                                                                                | NR, MAC                    |
| Review & Editing       | Preparation, creation and/or presentation of the published work by those from the original research group, specifically critical review, commentary or revision – including pre- or post-publication stages.   | NR, JLC, JAG, SA, MAH, MAC |

na = not applicable.

878  
879

880 **Table 1. Tumorigenic cell lines and their expression products.**  
881

| Cell line | AcGFP1<br>protein | KRAS <sup>G12D</sup><br>protein | p53 <sup>R167H</sup><br>protein | SMAD4<br>shRNA | p16 <sup>Ink4A</sup><br>shRNA |
|-----------|-------------------|---------------------------------|---------------------------------|----------------|-------------------------------|
| PGKP      | +                 | +                               | +                               |                |                               |
| PGKPS     | +                 | +                               | +                               | +              |                               |
| PGKPSC*   | +                 | +                               | +                               | +              | +                             |

882  
883 All cell lines based on primary porcine pancreatic ductal epithelial cells. \*Abbreviation key: **P** =  
884 pancreatic ductal epithelium; **G** = GFP; **K** = KRAS; **P** = p53; **S** = SMAD4; **C** =  
885 p16<sup>Ink4A</sup>/CDKN2A.  
886



887 **Figure Legends**

888

889 **Fig. 1. Isolation and transduction of primary porcine pancreatic ductal epithelial cells.** (A)

890 Phase image of cells isolated from porcine pancreatic duct, showing epithelial-like morphology

891 (bar = 1,000  $\mu\text{m}$ ). (B) Immunofluorescent staining for cytokeratin 19 in the cultured primary

892 cells (bar = 200  $\mu\text{m}$ ). (C) Immunoblot for the p53 mutant in nine different cells lines transduced

893 with the GKP virus (PGKP cells). Pancreas = wild type pancreatic ductal epithelial cells.

894 Representative blot of three separate experiments. (D-E) qPCR of KRAS and p53 mutants in the

895 nine PKGP cell lines. Each bar represents mean of three separate experiments. \* $p < 0.05$ , \*\*

896  $p < 0.03$ , \*\*\* $p < 0.01$  (unpaired t-test, compared to wild type).

897

898 **Fig. 2. Effect of SMAD4 and p16<sup>Ink4A</sup> knockdown on transformation in the PGKP cell line.**

899 (A) Soft agar assay and (B) migration assay in the nine GKP-transduced cell lines. Pancreas =

900 wild type pancreatic ductal epithelial cells. Each bar represents mean of three separate

901 experiments. (C) RT-PCR of SMAD4 and p16<sup>Ink4A</sup>/CDKN2A mRNA in cell lines expressing

902 targeted or scramble shRNA. Representative blot of three separate experiments. (D) Soft agar

903 assay and (E) migration assay of selected cell lines (PGKP, PGKPS, and PGKPSC), showing the

904 *in vitro* effect of additional knockdown of SMAD4  $\pm$  p16<sup>Ink4A</sup> on the transformation of GKP-

905 transduced pancreatic ductal epithelial cells.

906

907 **Fig. 3. *In vitro* transformation assays comparing the PGKP, PGKPS, and PGKPSC cell**

908 **lines.** (A) Cell culture population doubling time (count-based assay). Pancreas = wild type

909 pancreatic ductal epithelial cells. (B) Proliferation rate (metabolic dye-based assay), represented

910 as fold change, normalized to wild type cells. (C) Invasion (Matrigel®-based assay). Each bar or  
911 data point represents mean of three separate experiments.

912

913 **Fig. 4. *In vivo* tumorigenesis assays comparing the PGKP, PGKPS, and PGKPSC cell lines.**

914 (A) Sample of a resected tumor from subcutaneous injection in nude mice; note size and  
915 vascularity. (B) Tumor growth curve from the subcutaneous injection in nude mice. Each data  
916 point represents mean of 10 mice. (C) Metastasis after orthotopic implantation in nude mice

917

918 **Fig. 5. Tumor immunohistochemistry from subcutaneous nude mouse assay.** Representative

919 images of primary tumors derived from the PGKP, PGKPS, and PGKPSC cell lines stained with  
920 an array of epithelial markers, including E-cadherin (Ecad; B, G, L), Epithelial Cell Adhesion  
921 Molecule (EpCAM; C, H, M), Pan-Cytokeratin (PanCK; D, I, N), and Cytokeratin-19 (CK19; E,  
922 J, O); and also stained with mesenchymal markers, including  $\alpha$ -Smooth Muscle Actin (SMA; P,  
923 S, V), Vimentin (Vim; Q, T, W), and Type I Collagen (Col I; R, U, X). Bar = 200  $\mu$ m.

924

925 **Supporting Information**

926

927 **Fig. S1.** pIRES2-AcGFP1 Vector Information

928 **Fig. S2.** Studies with the NSRRC KRAS/p53 Oncopig

929 **Fig. S3.** KRAS/p53 immunohistochemistry of subcutaneous murine tumors

930 **Protocol S1.** Isolation of Epithelial Cells from Porcine Pancreas

931 **Protocol S2.** Porcine methodology

932 **Table S1.** Responses to the ARRIVE recommendations

933 **Table S2.** Responses to the NIH Preclinical Research Guidelines

934 **Table S3.** Primers and other short sequences

935 **Table S4.** Antibody information

936 **Table S5.** Oncopig descriptive data

937 **Table S6.** Oncopig serum laboratory testing

938

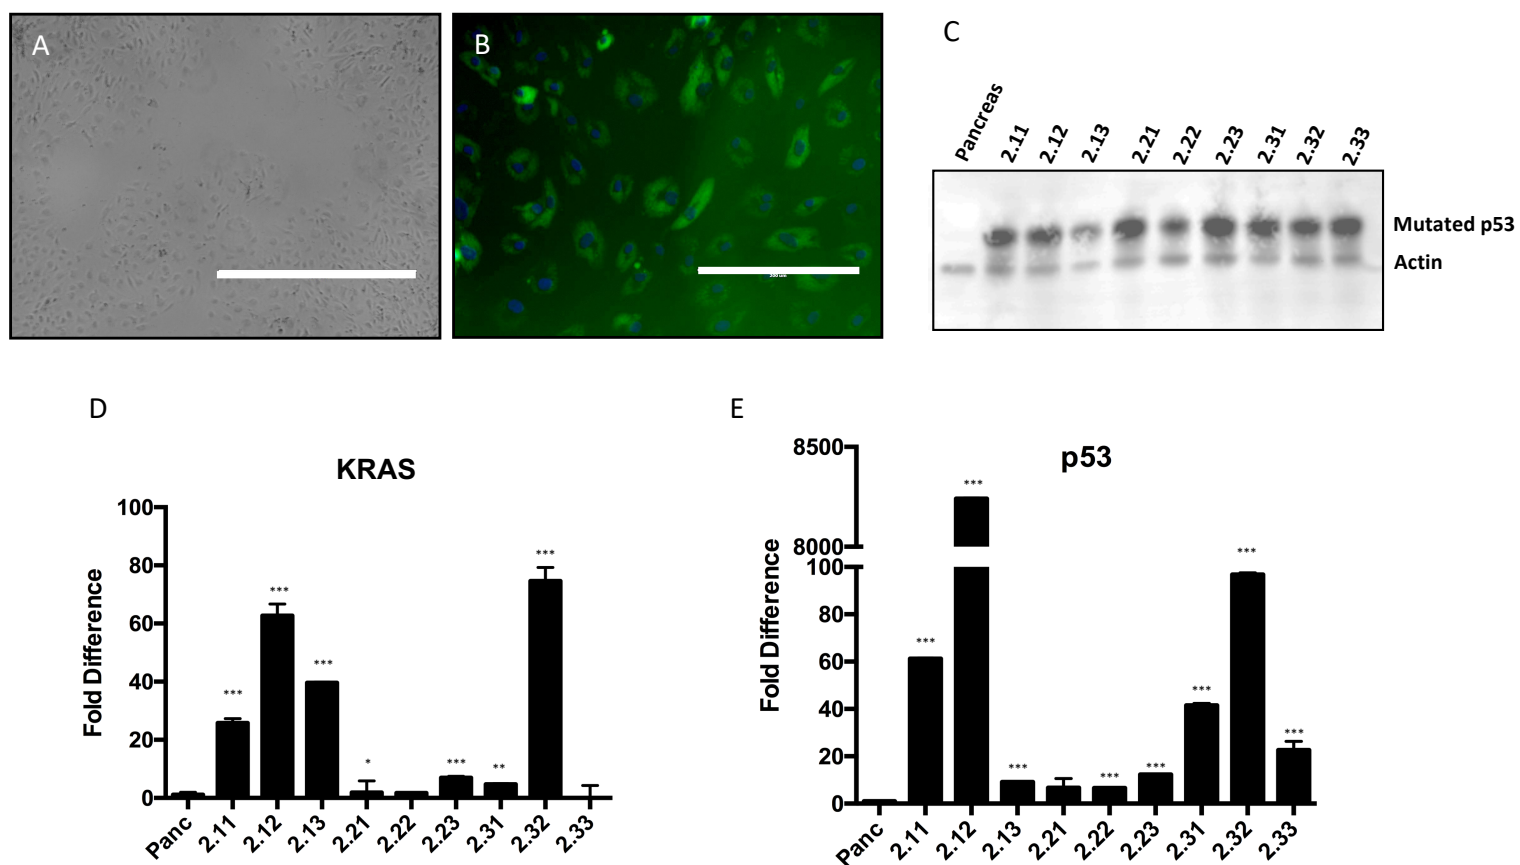

Figure 1

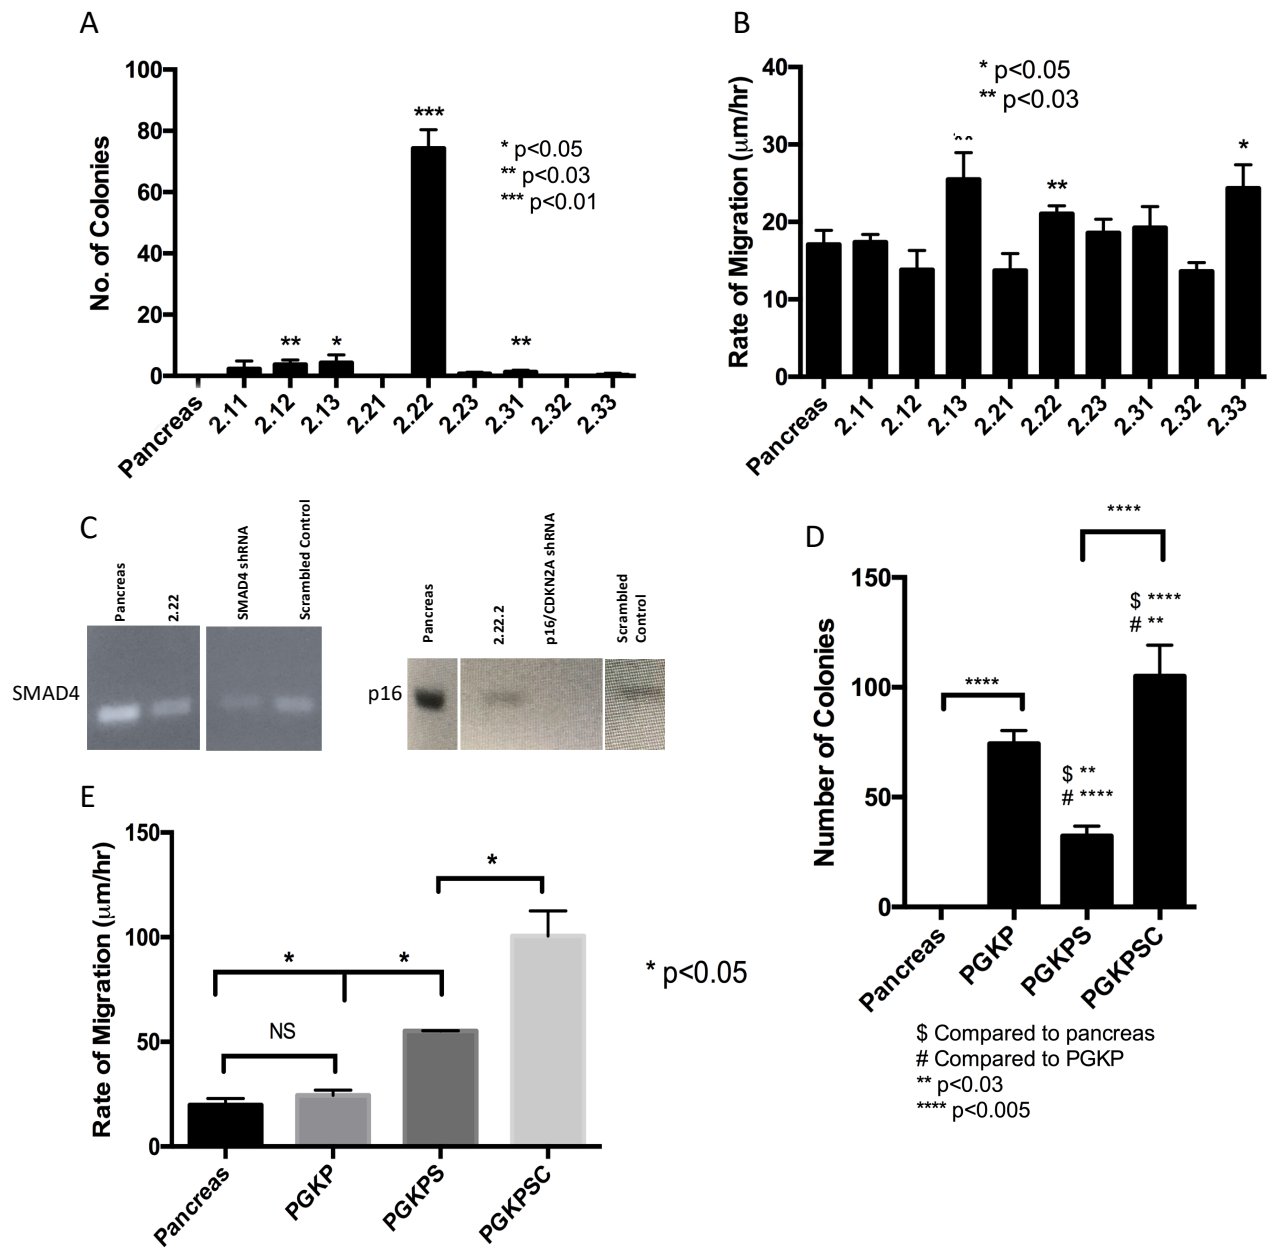

Figure 2

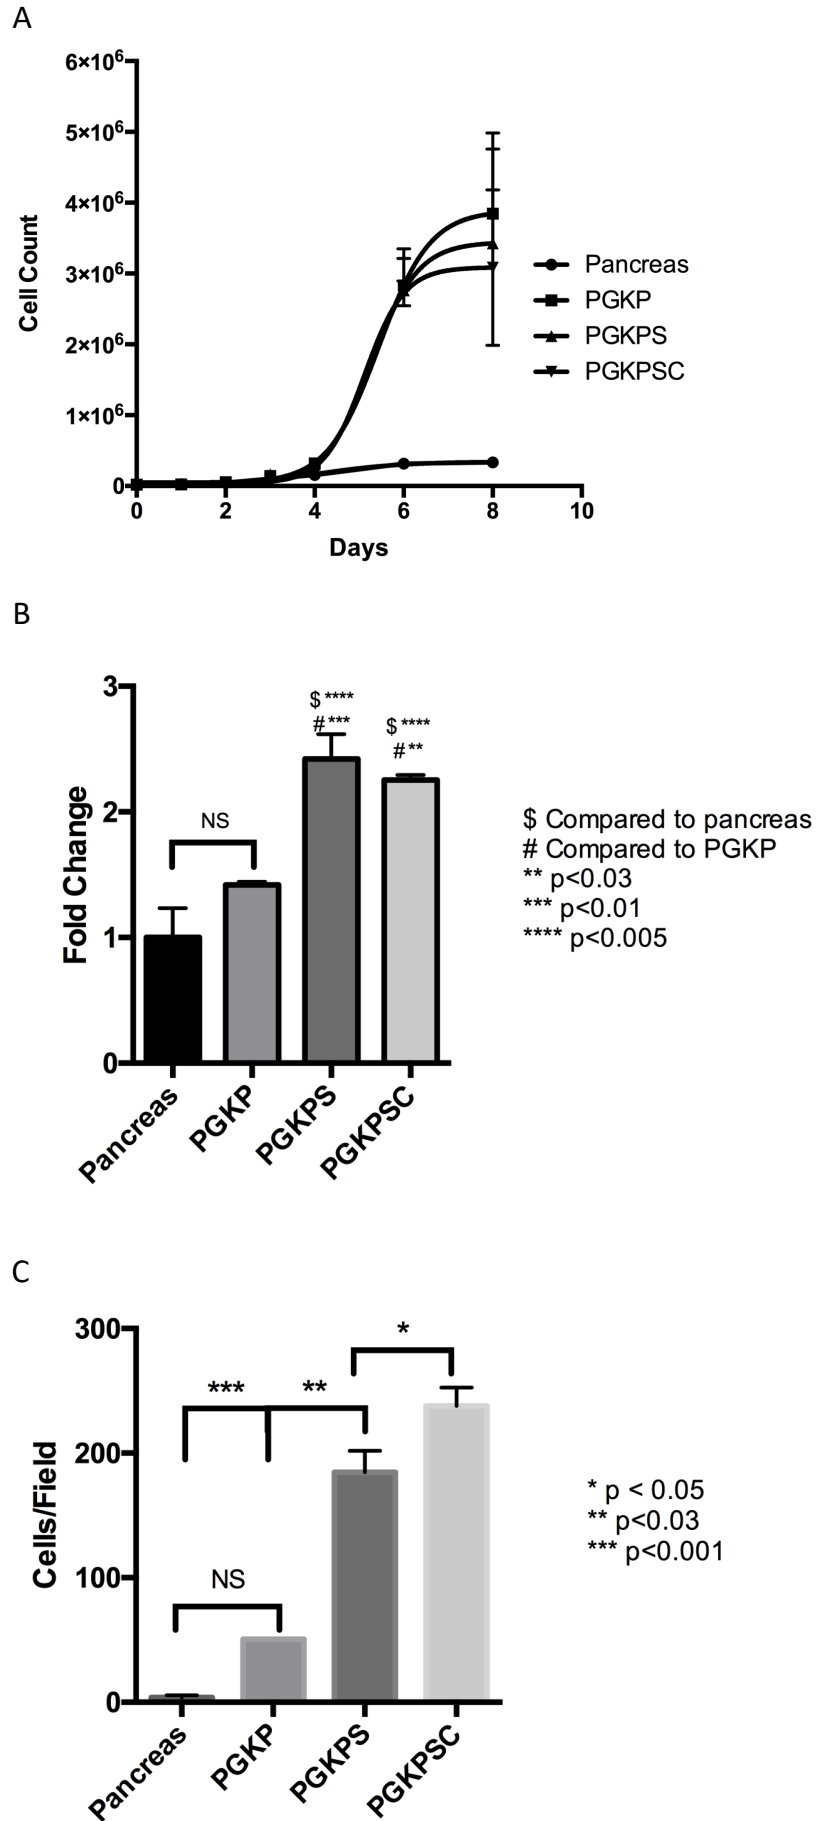

Figure 3

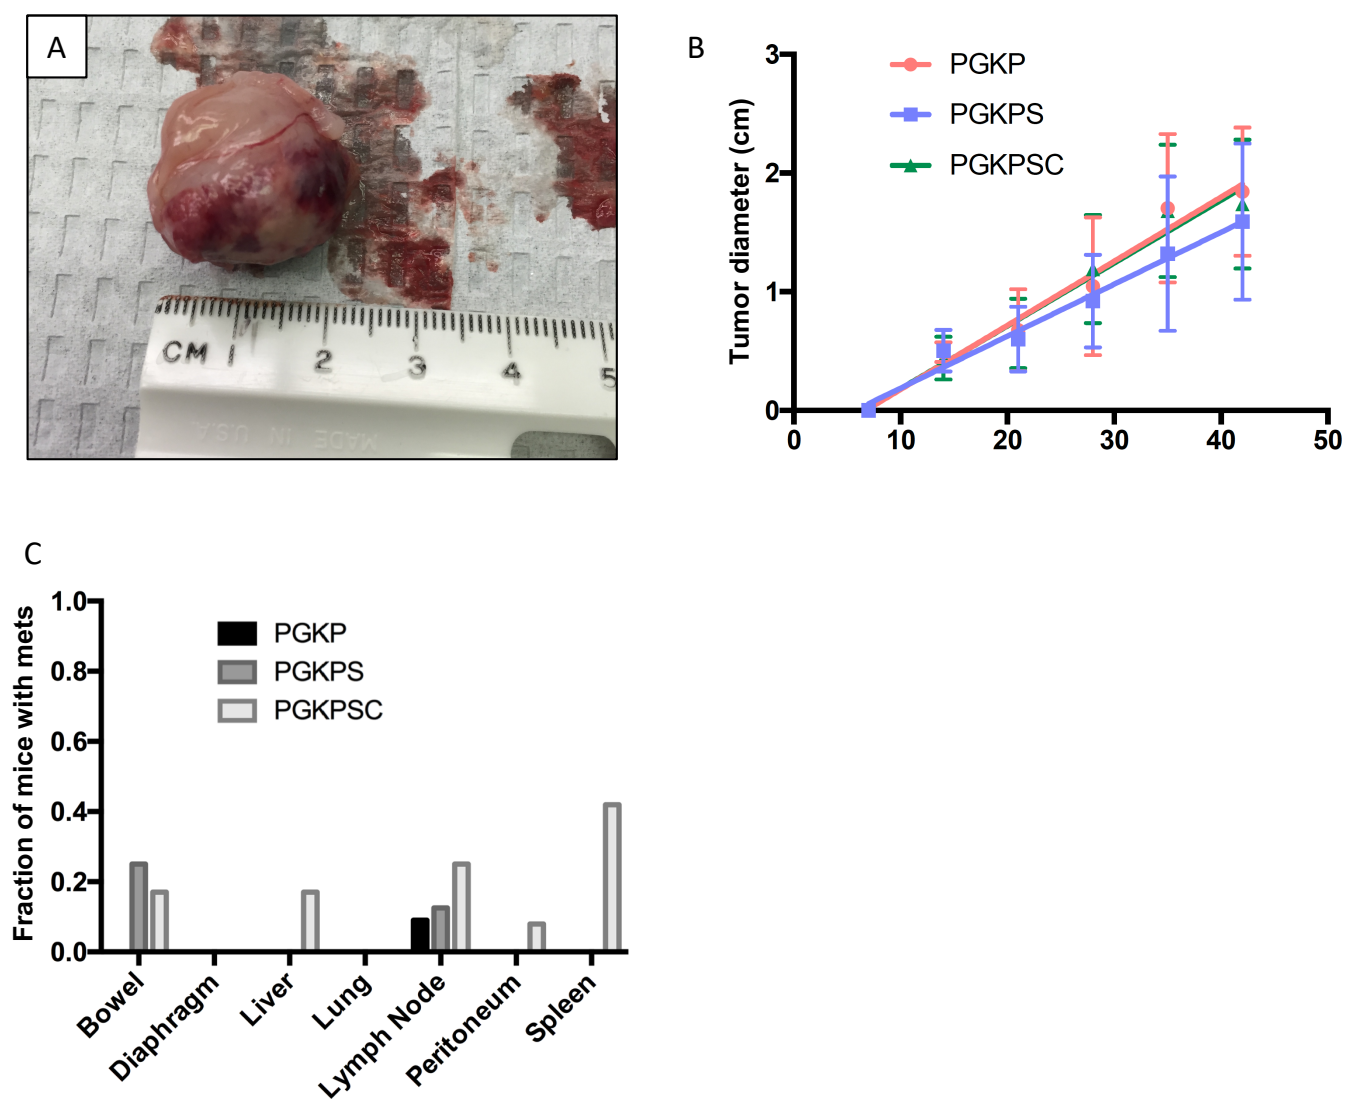

Figure 4



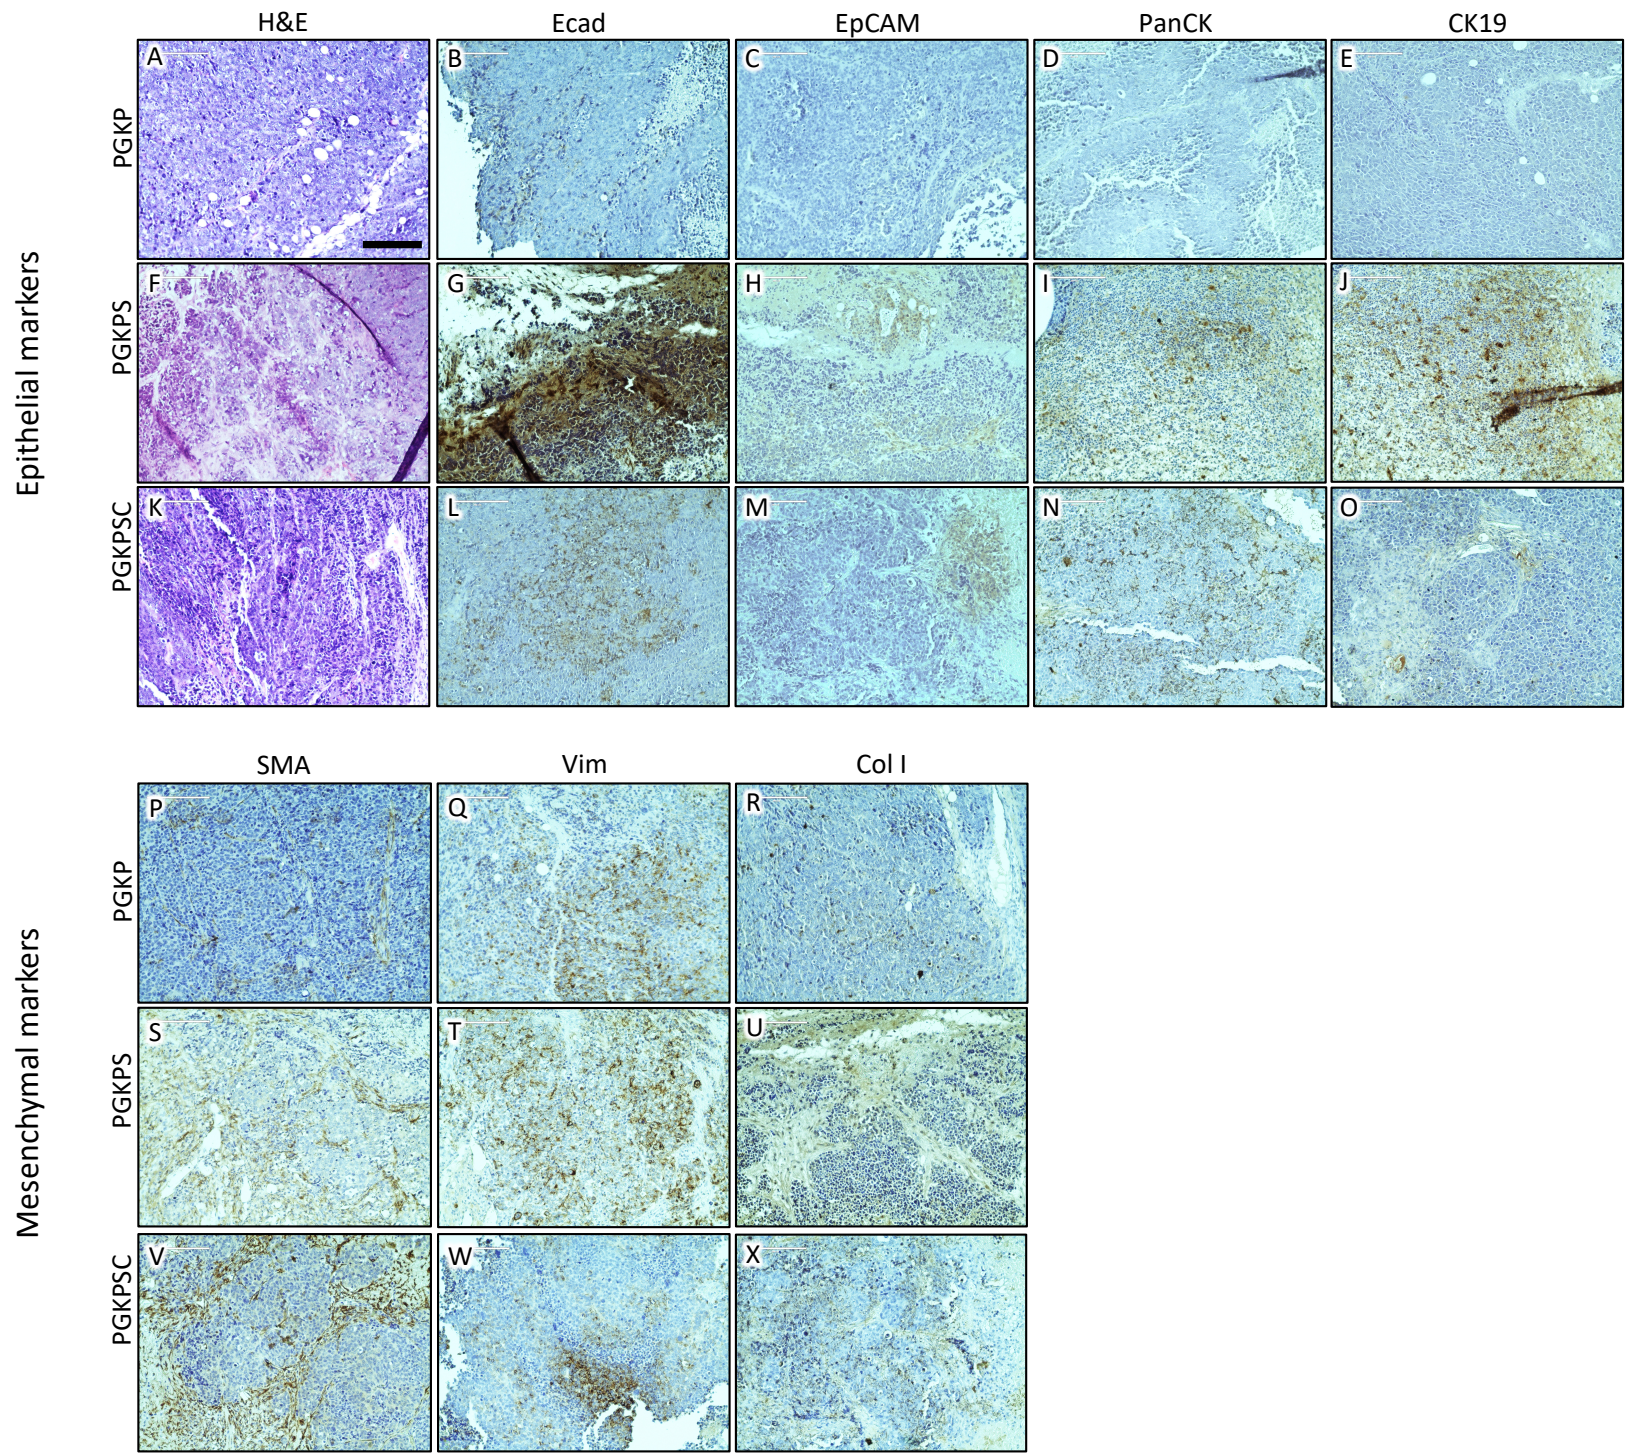

Figure 5
